# 1 **Chemical-genetic profiling reveals cross-resistance and collateral sen-** 2 **sitivity between antimicrobial peptides**

3  
4 Bálint Kintses<sup>1,8\*§</sup>, Pramod K. Jangir<sup>1,2§</sup>, Gergely Fekete<sup>1§</sup>, Mónika Számel<sup>1,2</sup>, Orsolya Méhi<sup>1</sup>,  
5 Réka Spohn<sup>1</sup>, Lejla Daruka<sup>1</sup>, Ana Martins<sup>1</sup>, Ali Hosseinnia<sup>3</sup>, Alla Gagarinova<sup>4</sup>, Sunyoung Kim<sup>3</sup>,  
6 Sadhna Phanse<sup>3</sup>, Bálint Csörgő<sup>1,5</sup>, Ádám Györkei<sup>1</sup>, Eszter Ari<sup>1,6</sup>, Viktória Lázár<sup>1,7</sup>, Anikó Faragó<sup>8</sup>,  
7 László Bodai<sup>8</sup>, István Nagy<sup>9</sup>, Mohan Babu<sup>3</sup>, Csaba Pál<sup>1\*</sup> & Balázs Papp<sup>1\*</sup>

8 <sup>1</sup>Synthetic and Systems Biology Unit, Institute of Biochemistry, Biological Research Centre of the  
9 Hungarian Academy of Sciences, 6726 Szeged, Hungary

10 <sup>2</sup>Doctoral School in Biology, Faculty of Science and Informatics, University of Szeged, Szeged,  
11 Hungary

12 <sup>3</sup>Department of Biochemistry, University of Regina, Regina, Saskatchewan S4S 0A2, Canada

13 <sup>4</sup>Department of Biochemistry, University of Saskatchewan, Saskatoon, Saskatchewan S7N 5E5,  
14 Canada

15 <sup>5</sup>Present address: Department of Microbiology and Immunology, University of California,  
16 San Francisco, CA 94143, USA.

17 <sup>6</sup>Department of Genetics, Eötvös Loránd University, 1117 Budapest, Hungary

18 <sup>7</sup>Present address: Faculty of Biology, Technion – Israel Institute of Technology, Haifa, Israel

19 <sup>8</sup>Department of Biochemistry and Molecular Biology, University of Szeged, 6726 Szeged, Közép  
20 fasor 52, Hungary

21 <sup>9</sup>Sequencing Platform, Institute of Biochemistry, Biological Research Centre of the Hungarian  
22 Academy of Sciences, 6726 Szeged, Hungary

23 \*Correspondence to cpal@brc.hu, pappb@brc.hu or kintses.balint@brc.mta.hu

24 §These authors contributed equally to this work.

25

26

## 27 **Abstract**

28 Antimicrobial peptides (AMPs) are key effectors of the innate immune system and promising ther-  
29 apeutic agents. Yet, knowledge on how to design AMPs with minimal cross-resistance to human  
30 host-defense peptides remains limited. Here, with a chemical-genetic approach, we systemati-  
31 cally assessed the resistance determinants of *Escherichia coli* against 15 different AMPs. Alt-  
32 hough generalizations about AMP resistance are common in the literature, we found that AMPs  
33 with different physicochemical properties and cellular targets vary considerably in their resistance  
34 determinants. As a consequence, collateral sensitivity effects were common: numerous genes  
35 decreased susceptibility to one AMP while simultaneously sensitized to others. Finally, the chem-  
36 ical-genetic map predicted the cross-resistance spectrum of laboratory-evolved human-B-defen-  
37 sin-3 resistant lineages. Our work substantially broadens the scope of known resistance-modu-  
38 lating genes and explores the pleiotropic effects of AMP resistance. In the future, the chemical-  
39 genetic map could inform efforts to minimize cross-resistance between therapeutic and human  
40 host AMPs.

41

## 42 **Introduction**

43 Antimicrobial peptides (AMPs) play a crucial role in general defense mechanisms against micro-  
44 bial pathogens in all classes of life. Although there is a considerable diversity in their amino acid  
45 content, length, and structure, AMPs are typically positively charged and amphipathic mole-  
46 cules<sup>1,2</sup>. These properties allow them to adsorb onto the bacterial cell surface and penetrate  
47 through the membrane to exert their diverse antibacterial actions<sup>3</sup>. As AMPs have a broad spec-  
48 trum of activity, considerable efforts have been allocated to the research and development of  
49 novel anti-infective compounds originating from AMPs<sup>4,5</sup>. However, the clinical development of  
50 AMP therapies, has also raised concerns that these approaches may drive bacterial evolution of  
51 resistance to human host-defense peptides<sup>6,7</sup>. As well, therapeutic AMPs are required to be active  
52 against pathogenic bacteria, many of which have already evolved resistance against human host  
53 AMPs<sup>8</sup>. Therefore, ideally, resistance mechanisms against therapeutic and host AMPs should not  
54 overlap.

55         Accumulating evidence suggest that AMPs differ considerably in their mode of actions,  
56 which may influence the specific microbial resistance mechanisms against them<sup>1,9</sup>. First, there  
57 are substantial differences in the electrostatic interactions and transport processes that lead to  
58 the cellular uptake of AMPs<sup>3,10</sup>. Second, the cellular targets of AMPs are also diverse in nature.  
59 For instance, apart from their membrane-disruptive activities, AMPs inhibit intracellular processes

60 such as bacterial DNA and RNA synthesis, translation, cell wall synthesis, and diverse metabolic  
61 pathways<sup>1,11</sup>. However, the extent to which the genetic determinants of resistance differ across  
62 AMPs remains unclear, because most of our knowledge comes from case studies characterizing  
63 only a limited number of membrane-targeting AMPs<sup>9</sup> (Supplementary Table 1). Therefore, there  
64 is an urgent need to comprehensively map the relationships between the modes of action of AMPs  
65 and the genetic determinants influencing bacterial susceptibility to them. Understanding these  
66 complex relationships would help to rationally choose AMPs for clinical development which are  
67 dissimilar to human host peptides in terms of the underlying resistance mechanisms.

68 Chemical-genetic profiling is a reverse genetic approach that quantifies the susceptibility  
69 of a genome-wide collection of mutant libraries to a set of chemical compounds<sup>12</sup>. By modulating  
70 gene dosage (i.e. either by depletion or overexpression), several studies demonstrated the ef-  
71 fectiveness of this tool to map cellular targets and genetic determinants of resistance for antibi-  
72 otics<sup>13-18</sup>. Moreover, antibiotics with similar chemical-genetic profiles, i.e. those with a large over-  
73 lap between the gene sets influencing resistance to them, are likely to share cellular targets and  
74 mechanism of action<sup>16</sup>. Therefore, chemical-genetics has been proposed as a useful tool to infer  
75 if resistance evolution to an antibiotic would lead to cross-resistance (decreased sensitivity) or  
76 collateral sensitivity (increased sensitivity) to another antibiotic<sup>12,19</sup>.

77 Here we employed a genome-wide chemical-genetic approach to explore the diversity of  
78 resistance determinants across AMPs in the model bacterium *Escherichia coli* (*E. coli*). First, we  
79 generated a comprehensive chemical-genetic map by measuring how overexpressing each of  
80 ~4,400 genes of *E. coli* influences the bacterium's susceptibility against 15 AMPs. The set of 15  
81 AMPs are structurally and chemically diverse and include AMPs with well-characterized modes  
82 of action, clinical relevance, or crucial role in the human immune defense (Table 1). By analyzing  
83 the large number of genes that influenced bacterial susceptibility to AMPs in the chemical-genetic  
84 screen, we identified major differences in the genetic determinants of resistance that clustered  
85 the AMPs according to their modes of action. Next, we confirmed our results with a complemen-  
86 tary chemical-genetic approach by testing the growth effect of a smaller set of 4 selected AMPs  
87 against an array of 279 partially-depleted essential genes (i.e. hypomorphs)<sup>20-22</sup>. The latter ap-  
88 proach provides information on the intrinsic resistome, i.e. the collection of genes that contribute  
89 to resistance at their native expression levels. Together, these screens revealed numerous genes  
90 that modulate susceptibility against membrane-targeting and intracellular-targeting AMPs in an  
91 antagonistic manner. Finally, evolving *E. coli* in the laboratory to become resistant to a key human

92 host-defense AMP demonstrated that chemical-genetic profiles are predictive of cross-resistance  
93 patterns between AMPs.

94

## 95 **Results**

96

### 97 **Chemical-genetic profiling reveals AMP resistance-modulating gene sets**

98 We generated chemical-genetic interaction profiles for a diverse set of AMPs (Table 1) by screen-  
99 ing them against a comprehensive library of gene overexpressions in *E. coli*<sup>23</sup>. Increasing gene  
100 dosage is a widely applied approach to reveal the targets of small molecule antibiotics<sup>24,25</sup>. It also  
101 informs on the ‘latent resistome’, that is, the collection of genes where a change from native ex-  
102 pression level enhances resistance to a particular drug<sup>26</sup>. We applied a sensitive competition as-  
103 say by monitoring growth of a pooled plasmid library overexpressing all the *E. coli* ORFs (Figure  
104 1a), as we reported earlier<sup>27</sup>. Specifically, *E. coli* cells carrying the pooled plasmid collection were  
105 grown in the presence or absence of one of the 15 AMPs tested, at a sub-inhibitory concentration  
106 that increased the doubling time of the whole population by 2-fold. Following 12 generations of  
107 growth, the plasmid pool was isolated from each selection and the relative abundance of each  
108 plasmid was determined by a deep sequencing readout (see Methods). By comparing plasmid  
109 abundances in the presence and absence of each AMP, we calculated a chemical-genetic inter-  
110 action score (fold-change value) for each gene and identified genes that increase or decrease  
111 susceptibility upon overexpression (Figure 1a, Supplementary Table 2, see Methods).

112 To validate our workflow, we took three distinct approaches. First, we tested the reproduc-  
113 ibility of the chemical-genetic profiles by correlating the chemical-genetic interaction scores be-  
114 tween replicate measurements. The overall correlation was comparable to what has been  
115 achieved with arrayed mutants on high-density agar plates<sup>16,28</sup> ( $r = 0.63$  from Pearson’s correla-  
116 tion, Figure 1b). This indicates that we measured the growth effects with sufficiently high confi-  
117 dence. Second, we picked 15 overexpression plasmids that showed diverse chemical-genetic  
118 interaction scores with multiple AMPs in our screen but did not influence the growth rate of *E. coli*  
119 in the absence of AMPs (see Methods). Performing minimum inhibitory concentration (MIC)  
120 measurements confirmed 84% of these chemical-genetic interactions (Supplementary Figure 1  
121 and Supplementary Table 3). Third, we collected examples from the literature where  
122 overexpression of an *E. coli* gene has been shown to influence sensitivity to a specific AMP.  
123 Despite differences in the used strains and protocols, 69% (9 out of 13) of the literature-curated

124 interactions were captured by our screen (Supplementary Table 4). Taken together, these anal-  
125 yses indicate that our workflow has high sensitivity and is suitable to measure chemical-genetic  
126 interactions between AMPs and gene overexpressions.

127  
128 **Chemical-genetic profiles group AMPs with similar mechanistic and physicochemical fea-**  
129 **tures**

130 We first explored how similarity in the chemical-genetic profiles informs on the functional and  
131 physicochemical properties of AMPs. To this end, we compiled literature data on known modes  
132 of action (Table 1) and computed physicochemical properties for each AMP (see Methods and  
133 Supplementary Table 5). Next, we grouped peptides with similar chemical-genetic profiles using  
134 a robust clustering method (see Methods). This procedure resulted in four main clusters, referred  
135 to as C1 – C4 (Figures 1c and 2a).

136 We found that clusters C1 and C2 contain mostly AMPs that target primarily the bacterial  
137 membranes, whereas most AMPs in clusters C3 and C4 have intracellular targets (Figure 2a and  
138 Table 1). Membrane-targeting AMPs (C1 and C2) have unique physicochemical properties (Sup-  
139 plementary Figure 2). Specifically, they have a lower isoelectric point and proline content, they  
140 are substantially more hydrophobic and have a higher propensity to form secondary structures  
141 than C3 and C4 peptides (Figure 2b). These properties facilitate efficient integration of these  
142 AMPs into the bacterial membrane where they create pores<sup>29,30</sup>. Notably, although peptides in  
143 both C1 and C2 are pore-formers, they indeed show subtle differences in their physicochemical  
144 features when multiple properties are considered jointly (Supplementary Figure 3).

145 The two clusters of intracellular-targeting AMPs (C3 and C4) have distinct physicochemi-  
146 cal properties. In particular, AMPs in cluster C4 have an especially high proline content, leading  
147 to elevated propensity to intrinsic structural disorder (Figure 2c). Structural disorder has been  
148 described as a common feature in a novel class of intracellular-targeting AMPs<sup>31</sup>. Indeed, the two  
149 AMPs in cluster C4 - Bactenecin 5 (BAC5) and cathelicidin PR-39 - are known to have intracellular  
150 targets only as they do not lyse the membrane (Table 1). By contrast, AMPs in cluster C3 showed  
151 features of both membrane- and intracellular-targeting ones (Figure 2). Reassuringly, Indolicidin  
152 (IND) and Protamine (PROA), which are in cluster C3, have been described to have both mem-  
153 brane disruptive and intracellular-targeting activities (Table 1). Finally, while CAP18 is generally  
154 considered as membrane-targeting, our data indicate that it could also have intracellular targets  
155 as it clusters with PROA in the chemical-genetic map (Figure 2a). Future works should elucidate  
156 the exact mode of action of this peptide.

157 Taken together, AMPs with similar chemical-genetic profiles share physicochemical fea-  
158 tures and previously described broad mechanisms of action, indicating that chemical-genetics  
159 can capture certain differences in the bactericidal effects across AMPs.

160

### 161 **Large and functionally diverse set of genes influences AMP resistance**

162 We identified between 88 – 778 and 348 – 1263 genes enhancing resistance and sensitivity per  
163 AMP, respectively (Figure 3a). This finding substantially broadens the scope of genes that en-  
164 hance resistance (latent resistome), as previously reported resistance genes in *E. coli* constitute  
165 only 0.46% (11 of 2371) of the resistance-conferring genes identified here (Supplementary Table  
166 6). Importantly, whereas genes annotated with cell envelope function were overrepresented  
167 among AMP susceptibility modulating genes (Supplementary Table 7), the majority of our hits did  
168 not have obvious functional connection with known AMP uptake mechanism or mode of action  
169 (Supplementary Figure 4).

170 Next, to assess the diversity of resistance determinants across AMPs, we calculated the  
171 extent to which the resistance- and sensitivity-conferring genes are shared between pairs of  
172 AMPs. To avoid underestimating the overlap between gene sets across AMPs, we employed an  
173 index of overlap that takes into account measurement noise (see Methods). Typically, ~63 % of  
174 the sensitive and ~31 % of the resistance genes overlapped between pairs of AMPs (Supplemen-  
175 tary Figure 5). The latter figure indicates substantial variation in the latent resistome across AMPs.  
176 Remarkably, the sets of resistance-conferring genes varied greatly even between AMPs in the  
177 same chemical-genetic cluster, in particular between AMPs in cluster C3 (Figure 3b). This pattern  
178 could reflect subtle differences in the modes of action across the intracellular-targeting AMPs  
179 within cluster C3 as these peptides differ in their specific targets (Table 1). Indeed, on a broader  
180 scale, membrane-targeting AMP pairs (C1-C2) and intracellular-targeting AMP pairs (C3-C4)  
181 shared more resistance genes than AMP pairs with different broad mechanisms of action (Figure  
182 3c).

183 These findings reveal a vast diversity of resistance determinants across peptides that re-  
184 flects differences in their modes of action and specific targets.

185

### 186 **Partial depletion of essential genes reveals intrinsic resistance to AMPs**

187 Chemical-genetic profiling based on gene depletion captures a different aspect of resistance de-  
188 terminants than gene overexpression<sup>32</sup>. While resistance upon increased gene dosage informs  
189 on the latent resistome, hypersensitivity upon gene depletion reveals genes that contribute to

190 resistance at their native expression levels, collectively called as the intrinsic resistome<sup>26</sup>. To investigate the intrinsic AMP resistome, we initiated a chemical-genetic screen with a set of 279 partially-depleted essential genes (hypomorphic alleles) of *E. coli*. We selected four AMPs with well-characterized modes of action, including two membrane-targeting (Pexiganan (PEX) and LL37 from C2) and two intracellular-targeting AMPs (BAC5 and PR39 from C4). Then, using a well-established high-density agar plate assay<sup>21,22,33</sup>, we determined their chemical-genetic interaction profiles across the hypomorphic alleles (Methods, Supplementary Table 8).

197 In total, we found that 75% of the 279 partially-depleted essential genes influenced susceptibility to at least one of the AMPs studied and 60% of these interactions caused hypersensitivity, indicating that essential genes often contribute to the intrinsic AMP resistome (Supplementary Table 8). We found substantial overlaps in the intrinsic resistomes between AMPs with similar modes of action. As high as 87% of the 279 hypomorphic alleles overlapped between PEX and LL37, and a similar figure emerged from the comparison of the gene set between BAC5 and PR39 (Figure 3d). In contrast, on average, only 59% of the 279 hypomorphic alleles were identical when functionally dissimilar AMPs were compared (Figure 3d).

205 Genes that simultaneously confer drug resistance when overexpressed and sensitivity when depleted are of special interest as such genes are likely to directly protect bacteria against drug stress or encode drug targets<sup>34</sup>. Comparison of our overexpression and hypomorphic screens revealed dozens of essential genes that showed both properties (Figure 3e). Remarkably, *folA* (dihydrofolate reductase), a known intracellular target of PR39<sup>35</sup>, was among the set of 6 genes that simultaneously conferred resistance when overexpressed and sensitivity when depleted in the presence of PR39. Similarly, *pssA* (a phosphatidylserine synthase) appeared in the presence of LL37, a membrane-targeting AMP. Reassuringly, deletion of *pssA* has been shown to alter membrane properties and increase bacterial sensitivity to membrane-targeting peptides<sup>36</sup>.

214 Together, these results indicate that both the intrinsic and the latent AMP resistomes are vast and shaped by the AMP's mode of action.

## 217 **Collateral sensitivity interactions are frequent between AMPs with different modes of action**

219 The limited overlap in resistance determinants across AMPs prompted us to hypothesize that some of the gene overexpressions might even have antagonistic effects against distinct AMPs. Specifically, we sought to identify resistance genes that induce collateral sensitivity, i.e. increase resistance to one AMP while simultaneously sensitize to another one<sup>37,38</sup>. We found numerous

223 such cases (Supplementary Table 6). For example, out of the 4,400 genes, we retrieved 643 that  
224 conferred resistance to 2 or more AMPs while increasing sensitivity to at least 2 other AMPs upon  
225 overexpression.

226 For each pair of AMP, we then calculated the overrepresentation of collateral sensitivity-  
227 inducing genes over random expectation (see Methods). Intriguingly, pairs of AMPs within the  
228 same chemical-genetic cluster were typically depleted in such genes (Figure 4a). In contrast, the  
229 relative overrepresentation of collateral sensitivity-inducing genes was pronounced between the  
230 clusters of membrane-targeting and intracellular-targeting AMPs (Figure 4b). Finally, both the  
231 overexpression and the hypomorphic allele screens indicate that collateral sensitivity interactions  
232 are prevalent between proline-rich AMPs in cluster C4 (BAC5, PR39) and membrane-targeting  
233 AMPs (Figure 4a and Supplementary Figure 6).

#### 234 **Perturbed phospholipid trafficking as a mechanism of collateral sensitivity**

235 We next focused on genes that showed reduced susceptibility to at least 4 membrane-targeting  
236 AMPs upon overexpression while at the same time showed elevated susceptibilities toward at  
237 least 4 intracellular-targeting AMPs. These genes were enriched in functions related to phospho-  
238 lipid and lipopolysaccharide (LPS) composition of the bacterial membrane (Supplementary Figure  
239 7). This trend is exemplified by MlaD and MlaE proteins (Supplementary Figure 7a), both being  
240 part of a protein complex that carries out retrograde phospholipid transport from the outer mem-  
241 brane to the inner membrane in Gram-negative bacteria<sup>39</sup>. Importantly, several studies have re-  
242 ported a role of the Mla (maintenance of lipid asymmetry) pathway in bacterial pathogenesis,  
243 virulence and antibiotic resistance<sup>40–42</sup>.

244 What could be the mechanism behind the antagonistic action of this pathway on mem-  
245 brane- versus intracellular-targeting AMPs? Since MlaD is part of a protein complex, it may lead  
246 to a loss-of-function effect upon overexpression<sup>43,44</sup>. To test this, we asked whether overexpres-  
247 sion and deletion of *mldA* cause similar changes in susceptibility to a representative set of mem-  
248 brane- and intracellular-targeting AMPs. Both mutations caused a decreased susceptibility to  
249 membrane-targeting AMPs and an increased susceptibility to intracellular-targeting ones (Figure  
250 5a, for MIC curves, see Supplementary Figure 8 and 9), demonstrating that overexpression per-  
251 turbs *mldA* function similar to a loss-of-function mutation.

252 It has been observed that *mldA* deletion alters the membrane composition by leading to  
253 the accumulation of phospholipids in the outer leaflet of the bacterial outer membrane<sup>39</sup>. A change



254 in membrane composition can alter the net negative surface charge of the cell<sup>3</sup>, which in turn  
255 strongly influences AMP susceptibility<sup>1</sup>. Thus, we hypothesized that depletion of functional MlaD  
256 decreases susceptibility to membrane-targeting AMPs by decreasing the net negative surface  
257 charge of the cell. On the other hand, membrane properties can also have an effect on membrane  
258 potential<sup>45</sup>. As the uptake of certain intracellular-targeting AMPs, for example, PROA and IND,  
259 are driven by membrane potential<sup>46,47</sup>, we posited that such an effect could underlie the observed  
260 collateral sensitivity interactions. To test this, we measured the net negative surface charge and  
261 the membrane potential of the MlaD overexpression and deletion strains (see Methods). Reas-  
262 suringly, both overexpressing and deleting *mldD* resulted in a significantly decreased negative  
263 surface charge (Figure 5b) and in increased membrane potential (Figure 5c).

264

### 265 **Chemical-genetic profiles predict the cross-resistance spectrum of human-B-defensin-3**

266 It has recently been proposed that chemical-genetics could be employed to infer whether re-  
267 sistance evolution to an antimicrobial agent would lead to cross-resistance to another agent<sup>12</sup>. In  
268 particular, a high overlap in the latent resistomes may indicate the emergence of cross-resistance  
269 during evolution in nature or in the laboratory. If so, the extent of cross-resistance between AMPs  
270 may show a pattern that follows the observed clusters in the chemical-genetic map.

271 To test this notion, we performed an adaptive laboratory evolution experiment against hu-  
272 man-B-defensin-3 (HBD-3). We have chosen this AMP due to its relevance as a human host-  
273 defense peptide, and because its chemical-genetic profile is similar to AMPs belonging to cluster  
274 C2, but markedly different from the rest of AMPs (Figure 1c and 2a). Ten parallel *E. coli* cell  
275 populations were propagated under increasing concentration of HBD-3 for approximately 120  
276 bacterial generations (see Methods). An approximately 10-fold increase in minimum inhibitory  
277 concentration (MIC) was observed in the evolved lineages (Supplementary Figure 10). Out of the  
278 10 evolved lines, 4 were subjected to whole-genome sequencing to identify the mutations under-  
279 lying elevated AMP resistance. Genome sequence analysis revealed a total of 27 unique muta-  
280 tional events (including large deletions, Supplementary Table 9).

281 We then measured how the susceptibility of the four evolved lines changed to a set of 10  
282 AMPs representing the four major chemical-genetic clusters (C1 to C4). We found that high levels  
283 of cross-resistance occurred only to AMPs that were clustered together with HBD-3 in the chem-  
284 ical-genetic map (C2), while cross-resistance to AMPs belonging to the other three clusters (C1,  
285 C3, C4) were rare (Figure 6a). These results demonstrate that clustering of the chemical-genetic  
286 profiles predicted the observed cross-resistance patterns of the HBD-3-adapted lines.

287           Next, we interrogated if the chemical-genetic profiles provide an insight into the molecular  
288 mechanisms underlying the cross-resistance patterns of the HBD-3-evolved lines. To this end,  
289 we first analyzed the function of the mutated genes. Phospholipid and LPS-related genes were  
290 overrepresented among the mutated genes (Supplementary Figure 11a). Specifically, three HBD-  
291 3-evolved lines carried mutations in genes involved in retrograde phospholipid transport (Mla  
292 pathway, see Supplementary Table 9). As overexpression of genes in this pathway induced re-  
293 sistant chemical-genetic interactions to membrane-targeting peptides only (Supplementary Figure  
294 7 and 11b), we hypothesized that the mutations in the phospholipid transport genes contribute to  
295 the observed cross-resistance patterns in the evolved lines (Figure 6a).

296           To test this hypothesis, we reconstructed an adaptive mutation (A342mIaD\*) which was  
297 identified in a HBD-3-evolved line by inserting it into the *mIaD* gene of wild-type *E. coli*. Then, we  
298 measured the susceptibility of this mutant to a selected set of membrane-targeting (C1-C2) and  
299 intracellular-targeting AMPs (C3-C4). As expected, the strain carrying the A342mIaD\* mutation  
300 showed a decreased susceptibility to membrane-targeting AMPs and an increased susceptibility  
301 to intracellular-targeting ones, similarly to the MlaD overexpression strain (Figure 6b, for MIC  
302 curves, see Supplementary Figure 12). In agreement with these findings, measuring the net neg-  
303 ative surface charge and the membrane potential of the mutant strain confirmed the same muta-  
304 tional effects as in the case of the *mIaD* overexpression and deletion strains (Figure 6c and 6d).

305           In sum, the chemical-genetic profiles predicted the observed cross-resistance patterns of  
306 the HBD-3-evolved lines and illuminated the mechanistic basis thereof.

307

## 308 **Discussion**

309           This work systematically mapped the genetic determinants of AMP resistance by chemical-ge-  
310 netic profiling in *E. coli* (Figure 1). We report that AMP resistance is influenced by a large set of  
311 functionally diverse genes, and yet these genes overlap only to a limited extent between AMPs.  
312 Specifically, clustering of the chemical-genetic profiles revealed that the modes of action of the  
313 AMPs largely define the gene sets that influence bacterial susceptibility against them (Figure 2  
314 and 3). Additionally, antagonistic mutational effects are frequent between AMPs that disrupt the  
315 bacterial membrane versus those that act on intracellular targets (Figures 4 and 5). Finally, by  
316 applying adaptive laboratory evolution in the presence of HBD-3, a human AMP targeting the  
317 bacterial membrane, we show that the clustering of the chemical-genetic profiles predicts the  
318 cross-resistance spectra of the evolved *E. coli* lines across different groups of AMPs (Figure 6).

319 This indicates that cross-resistance between AMPs are shaped by the overlap in chemical-genetic  
320 profiles.

321 The results presented in this study have important implications for the development of  
322 AMP-based therapies. Previous works reported several instances of cross-resistance interactions  
323 between membrane-targeting peptides, however, the potential for cross-resistance across AMPs  
324 with different modes of action has remained poorly understood. Specifically, while cross-re-  
325 sistance between host and therapeutic AMPs is certainly a realistic danger, not all AMPs are  
326 equally prone to cross-resistance. Given the immense diversity of AMPs with major differences in  
327 physicochemical properties and resistance mechanisms, we propose that carefully chosen ther-  
328 apeutic candidates could mitigate the risk of cross-resistance with specific human host-defense  
329 peptides. From our screen, proline-rich AMPs are the best candidates in this respect, supporting  
330 the considerable effort that has already been taken into the clinical development of proline-rich  
331 AMP-based therapeutic applications<sup>48,49</sup>. Additionally, a distinct group of membrane-targeting  
332 AMPs (R8, TPII and CP1) appear to be less prone to cross-resistance to the investigated human  
333 host-defense AMPs. Clearly, this work made the first step in this direction and future studies  
334 should explore these possibilities. Specifically, cross-resistance patterns of proline-rich AMPs in  
335 human saliva and synthetic AMPs should also be considered<sup>50</sup>.

336 The large diversity of genes that influence AMP resistance upon overexpression indicates  
337 that bacterial susceptibility to AMPs is coupled to the general physiology of the bacterial cell, and  
338 in particular to alterations in membrane composition. This idea also provides an explanation to a  
339 recent finding that antibiotic resistance mutations in membrane proteins frequently induce collat-  
340 eral sensitivity to AMPs through pleiotropic side effects that alter membrane composition<sup>27</sup>. In-  
341 deed, the overrepresentation of collateral sensitivity interactions among AMP resistance determi-  
342 nants implies that evolving AMP resistance requires the optimization of many traits simultane-  
343 ously. As a consequence, bacterial cells potentially harbor a large mutational target to alter AMP  
344 resistance, however, such mutations often have negative trade-offs with other cellular traits.

345 Collateral sensitivity between AMPs is best exemplified by the Mla pathway. Several stud-  
346 ies have reported the importance of Mla pathway in bacterial pathogenesis and virulence<sup>40–42</sup>. For  
347 example, loss-of-function mutations in Mla pathway in *Haemophilus influenzae* increased the ac-  
348 cumulation of phospholipids in the outer membrane, which mediated sensitivity to human serum<sup>40</sup>.  
349 Here, we demonstrated that a loss-of-function mutation in *mldD* decreases the net negative sur-  
350 face charge of the bacterial membrane and, eventually, causes a somewhat increased resistance

351 to human membrane-targeting AMPs (Figure 5a,b, 6b,c), and an elevated susceptibility to intra-  
352 cellular-targeting AMPs (Figure 6e). Together, our work indicates that a trade-off between mem-  
353 brane surface charge and membrane potential underlie collateral sensitivity interactions between  
354 membrane-targeting and intracellular-targeting AMPs upon perturbing the Mla pathway. We spec-  
355 ulate that this trade-off could contribute to the observed variation in the expression level of Mla  
356 pathway proteins among clinical isolates of *H. influenzae*<sup>40</sup>.

357 Our results also have implications to an important but unresolved issue: why have natural  
358 AMPs that are part of the human innate immune system remained effective for millions of years  
359 without detectable resistance in several bacterial species? One possibility, supported by our work,  
360 is that bacteria may have difficulty to evolve resistance to the combination of multiple defense  
361 peptides deployed by the immune system due to negative trade-offs between them. We do not  
362 wish to claim, however, that AMPs in clinical use would generally be resistance-free. Rather,  
363 these properties of the AMPs could be beneficial for the development of combination therapies  
364 involving AMPs in combination with antibiotics and human host peptides.

365

## 366 **Materials and methods**

367 **Media, bacterial strains and antimicrobial peptides.** Experiments with AMPs were conducted  
368 in minimal salts (MS) medium supplemented with MgSO<sub>4</sub> (0.1 mM), FeCl<sub>3</sub> (0.54 µg/ml), thiamin  
369 (1 µg/ml), casamino acids (0.2%) and glucose (0.2%). Luria-Bertani (LB) medium contained tryptone  
370 (0.1%), yeast extract (0.05%), and NaCl (0.05%). All components were purchased from  
371 Sigma-Aldrich. To increase the dosage of each *Escherichia coli* gene for the chemical-genetic  
372 screen, we used the *E. coli* K-12 Open Reading Frame Archive library (ASKA)<sup>23</sup> in *Escherichia*  
373 *coli* K12 BW25113 cells. AMPs were custom synthesized by ProteoGenix, except for protamine  
374 and polymyxin B, which were purchased from Sigma-Aldrich. AMP solutions were prepared in  
375 sterile water and stored at -80°C until further use.

376  
377 **Plasmid DNA preparation and purification.** Bacterial cells harbouring the ASKA plasmids were  
378 grown overnight in LB medium supplemented with chloramphenicol (20 µg/ml). Cells were har-  
379 vested by centrifugation. Plasmid DNA isolation was performed using innuPREP plasmid mini Kit  
380 (Analytik Jena AG) according to the manufacturer's instructions. To remove the genomic DNA  
381 contamination, the isolated plasmid DNA samples were digested overnight with Lambda exonu-  
382 clease and exonuclease I (Fermentas) at 37°C. The digested plasmid DNA samples were purified  
383 with DNA Clean & Concentrator™ (Zymo) kit according to the manufacturer's instructions.

384  
385 **Chemical-genetic profiling.** We carried out chemical-genetic profiling to determine the impact  
386 of the overexpression of each *E. coli* ORF on bacterial susceptibility to each of the 15 different  
387 AMPs. To this end, we used the ASKA plasmid library (GFP minus) where each *E. coli* ORF is  
388 cloned into a high copy number expression plasmid (pCA24N-ORFGFP(-)). Prior to screening,  
389 this plasmid collection was pooled and transformed into *E. coli* K12 BW25113 strain as described  
390 before<sup>51</sup>. To obtain a negative control strain not having any overexpressed gene, the plasmid  
391 without a cloned ORF (pCA24N-noORF) was also transformed into the same *E. coli* strain. Then,  
392 on the pooled collection, we applied a previously reported competitive growth assay<sup>27</sup>. Specifi-  
393 cally, the pooled overexpression library and the control strain were grown in parallel in MS me-  
394 dium supplemented with 20 µg/ml chloramphenicol and the overexpression was induced by 100  
395 µM isopropyl-β-D-thiogalactopyranoside (IPTG). After 1h induction, ~5 x 10<sup>5</sup> bacterial cells from  
396 the library were inoculated into each well of a 96-well microtiter plate containing a concentration  
397 gradient of an AMP in the MS medium supplemented with 20 µg/ml chloramphenicol and 100 µM  
398 IPTG. At the same time, both the library and the control strain with the empty plasmid were grown  
399 in the absence of any AMPs. We took special care to grow both of these samples in the exact

400 same conditions as the samples in the presence of AMPs. Bacterial growth was monitored in a  
401 microplate reader (Biotek Synergy 2) for 24 h. At the end of the exponential growth phase, we  
402 selected those wells in which the doubling time of the cell population was increased by 2-fold.  
403 Then, from these wells, cells were split into four equal proportion and each was transferred into  
404 20 mL of MS medium supplemented with the corresponding AMP in four different concentrations  
405 in the range that slowed down growth by two-fold in the microtitre plate. Then, following exponen-  
406 tial growth, out of the four 20 mL cultures those that showed again a two-fold increase in doubling  
407 time were selected for further analysis. The rationale for this 2-step process was to maintain com-  
408 petition in exponential phase for 12 generations of growth, efficiently control the growth rate in a  
409 reproducible manner and obtain the plasmid pool with standard DNA isolation protocol (innuPREP  
410 plasmid mini Kit, Analytik Jena AG) in a yield that is enough for the downstream analysis. Each  
411 of the selected plasmid samples was digested overnight with a mixture of lambda exonuclease  
412 and exonuclease I (Fermentas) at 37°C to remove the genomic DNA background. The digested  
413 plasmid DNA samples were purified with DNA Clean & Concentrator™ (Zymo) kit according to  
414 the manufacturer's instructions. This protocol was carried out in two biological replicates for each  
415 AMP treatment. In the case of the untreated sample (in the absence of AMP), we had five repli-  
416 cates. *E. coli* BW25113 strain carrying the empty vector was used as a negative control to meas-  
417 ure read counts originating from genomic DNA contamination during plasmid preparation (back-  
418 ground).

419  
420 **Deep sequencing of plasmid pool.** The cleaned plasmid samples were sequenced with the  
421 SOLiD next-generation sequencing system (Life Technologies) and the relative abundance of  
422 each plasmid was determined as described previously<sup>27,51</sup>. Briefly, the isolated plasmid pool sam-  
423 ples were fragmented and subjected to library preparation. Library preparation and sequencing  
424 was performed using the dedicated kits and the SOLiD4 sequencer (Life Technologies), respec-  
425 tively. For each sample, 20-25 million of 50 nucleotide long reads were generated. Primary data  
426 analysis was carried out with software provided by the supplier (base-calling). The 50 nucleotide  
427 long reads were analyzed, quality values for each nucleotide were determined using the CLC Bio  
428 Genomics Workbench 4.6 program.

429  
430 **Data analysis of chemical-genetic screen.** Raw sequence data processing and mapping onto  
431 *E. coli* ORFs were carried out as described previously<sup>27</sup>. Raw sequence data were also mapped  
432 to the plasmid backbone. In order to make the mapped read counts comparable between the  
433 different samples, we carried out the following data processing workflow based on established

434 protocols<sup>52,53</sup>, using a custom-made R script. The extra read counts deriving from genomic DNA  
435 contamination (background) were estimated by assuming that the reads mapping to the unit  
436 length of the plasmid and the ORFs should have a ratio of 1:1. The total extra read count esti-  
437 mated thereof was partitioned among the ORFs based on their background frequency (that is,  
438 their relative frequency obtained from the experiment involving the empty plasmid). Next, these  
439 ORF-specific backgrounds were subtracted from the read counts. Then, a loglinear transformation  
440 was carried out on the background-corrected relative read counts. Compared to the canonical  
441 logarithmic transformation, this transformation has the advantage of avoiding the inflation of data  
442 variance for ORFs with very low read counts<sup>54</sup>. The transformed relative read counts showed  
443 bimodal distributions (Supplementary Figure 14). The lower mode of the distribution corresponds  
444 to ORFs that were not present in the sample. The upper mode represents those ORFs whose  
445 growth was unaffected by overexpression (i.e. no fitness effect). To make different samples com-  
446 parable, the two modes of the distribution of each sample were set to two predefined values.  
447 These values were chosen such that the original scale of the data was retained. In order to align  
448 the modes between samples, we introduced two normalization steps: one before and one after  
449 loglinear transformation. The first normalization step identified the lower mode corresponding to  
450 the absent strains and added a constant to shift the lower mode to zero. Next, we performed the  
451 loglinear transformation step described above. The second normalization step was a linear trans-  
452 formation moving the upper mode to a higher predefined value. Following these normalization  
453 steps, genes that were close to the lower mode in the untreated samples were discarded from  
454 the analysis as these represent strains that displayed poor growth even in the absence of drug  
455 treatment (that is, AMP sensitivity could not be reliably detected). A differential growth score (i.e.  
456 fold-change) was calculated for each gene as the ratio of the normalized relative read counts in  
457 treated and non-treated samples at the end of the competition. Fold-change values of biological  
458 replicate experiments were averaged. Genes that showed at least 2-fold lower and higher relative  
459 abundance at the end of the competition upon AMP treatment were considered as sensitive and  
460 resistant genes, respectively.

461  
462 **Cluster analysis of chemical-genetic profiles.** To group AMPs with similar chemical-genetic  
463 profiles, we employed an ensemble clustering algorithm that combines multiple clustering results  
464 to obtain a robust clustering<sup>55</sup>. A combination of diverse clustering results based on perturbing the  
465 input data and clustering parameters is known to yield a more robust grouping of data points than  
466 that obtained from a single clustering result.

467 As a first step, we removed genes that did not show AMP-specific phenotypes across  
468 treatments since these genes would be uninformative for clustering. To this end, we retained only  
469 those genes that showed significant differences in their fold-change values between AMPs com-  
470 pared to their variances across replicate measurements within AMPs as assessed by F-tests  
471 ( $p < 0.01$ ). This resulted in a set of 2146 genes kept for clustering. Next, we employed a distance  
472 metric, normalized variation of information, to measure distances between AMP chemical-genetic  
473 profiles. The normalized variation of information is closely related to mutual information but has  
474 the advantage of being a true distance metric. Importantly, normalized variation of information  
475 gives more weight to rare overlaps of resistance/sensitivity phenotypes between AMPs, unlike the  
476 commonly used Euclidean distance. Normalized variation of information (NVI) between AMP pairs  
477 was calculated as follows:  $NVI = (H - I) / H$  where  $H$  is the entropy and  $I$  is the mutual information.

478 Based on this distance measure, we then generated 75,000 clusters of AMPs by perturb-  
479 ing both the AMP profile data and the clustering parameters. The AMP profile data was perturbed  
480 by resampling the gene set with replacement and by randomly selecting a single chemical-genetic  
481 profile among the multiple biological replicates available for each AMP. We used hierarchical  
482 clustering and varied both the algorithms (Ward, single-linkage, complete-linkage and average-  
483 linkage) and the number of clusters defined ( $k = 2 \dots 6$ ). Results of the 75,000 clusters were sum-  
484 marized in a consensus, which contains, for each pair of AMP, the number of times that two AMPs  
485 cluster together across all of the clustering results. Finally, we clustered this consensus matrix  
486 using hierarchical clustering and complete linkage and plotted the result as a heatmap.

487  
488 **Construction of hypomorphic alleles for chemical-genetic screening.** A total of 279 essential  
489 gene hypomorphs (with reduced protein expression) were constructed essentially as previously  
490 described<sup>20,21</sup>. Briefly, as with the mRNA perturbation by DAmP (decreased abundance by mRNA  
491 perturbation) alleles in yeast<sup>56</sup>, we created an essential gene hypomorphic mutation by introduc-  
492 ing a kanamycin (Kan<sup>R</sup>) marked C-terminal sequential peptide affinity fusion tag, engineered by  
493 homologous recombination into each essential gene<sup>57</sup>. The tag perturbs the 3' end of the ex-  
494 pressed mRNA of the essential proteins, when combined with environmental/chemical stressors,  
495 or other mutations by destabilizing the transcript abundance. A subset of these hypomorphic al-  
496 leles that we used<sup>21,22,58,59</sup> or shared with others<sup>16</sup> have revealed functionally informative gene-  
497 gene, and gene-environment or drug-gene interactions.

498 Analogous to our *E. coli* synthetic genetic array approach<sup>58</sup>, our chemical-genetics screening  
499 strategy involves robotic pinning of each Kan<sup>R</sup> marked single essential gene hypomorph arrayed  
500 in 384 colony format on Luria Broth (LB) medium, in quadruplicate, onto the minimal medium



501 containing AMPs under a selected concentration, in two replicates, generating eight replicates in  
502 total for each essential gene hypomorph. The sub-inhibitory concentration was chosen based on  
503 50% growth inhibition of wild-type cells using a serial dilution. In parallel, we also prepared two  
504 replicates of control plates containing arrayed essential gene hypomorphic strains pinned onto  
505 minimal media without AMPs. After incubation at 32°C for 20 h, the plates (with and without AMPs)  
506 were digitally imaged and colony sizes were extracted from the imaged plates using an adapted  
507 version of the gitter toolbox<sup>60</sup>. The resulting raw colony size (proxy for cell growth) from each  
508 screen, with and without AMP, was normalized using SGAtools suite<sup>61</sup>, with default parameters.  
509 The normalized colony sizes from the AMP plate was subtracted from their corresponding colony  
510 screened without AMP to estimate the final hypomorphic-strain fitness score (sensitive or re-  
511 sistant), which is as an average of all eight replicate measurements recorded for each hypo-  
512 morphic allele.

513  
514 **Physicochemical properties of AMPs.** Protein amino acid frequencies were counted with an in-  
515 house perl script. Isoelectric point, hydrophobicity, hydrophobic moment, net charge and mem-  
516 brane surface was calculated with the peptides R package, version 2.4<sup>62</sup>. The ExPasy Prot Param  
517 tool was used for calculating molecular weight and peptide length<sup>63</sup>.

518  
519 **Differentiation between AMP clusters based on physicochemical parameters.** Logistic re-  
520 gression framework was used with two parameters to infer differences between C1 and C2 clus-  
521 ters in the peptides physicochemical properties. Area under the receiver operating characteristic  
522 curve (ROC) was used to establish model accuracies and rank parameter pairs using the caret  
523 (v6.0-80) and e1071 (v1.7-0) R packages. For a global analysis of cluster properties, principal  
524 component analysis was applied to all the peptide physicochemical properties with centering and  
525 scaling the data using the princomp R package. All calculations were done in R version 3.5.0 in  
526 Rstudio version 1.1.447<sup>64,65</sup>.

527  
528 **Calculating the overlap in resistance / sensitivity gene sets between AMPs.** To calculate the  
529 extent to which the resistance- and sensitivity-conferring genes are shared between pairs of  
530 AMPs, we used a modified version of the Jaccard index that takes into account measurement  
531 noise. Specifically, for each pair of AMP, we calculated the Jaccard index of overlap between their  
532 sets of resistance genes and performed a correction by dividing this value by the average Jaccard  
533 index of overlap between replicate screens of the same AMPs. Thus, a corrected Jaccard index

534 value of 1 between two AMPs indicates that the set of resistance genes overlap as much as that  
535 of two replicate screens.

536

537 **Enrichment of collateral sensitivity interactions between AMP pairs.** We calculated the  
538 overrepresentation of collateral sensitivity-inducing genes for each AMP pair over random expect-  
539 tation using data from our overexpression screen. Random expectation was calculated using the  
540 number of resistance and sensitive genes for each AMP. Enrichment ratio (r) of collateral sensi-  
541 tivity-inducing genes for each AMP pair was calculated as follows:

$$542 \quad r = x/e$$

543 where:

544 x - actual frequency of the genes showing collateral sensitivity interactions between AMP  
545 pair

546 e - expected frequency (based on marginal probability) of the genes showing collateral  
547 sensitivity interactions between AMP pair. Expected frequency (e) was calculated as fol-  
548 lows:

$$549 \quad e = R_{amp1} * S_{amp2}$$

550 where:

551  $R_{amp1}$  = relative frequency of genes showing resistance to AMP1 out of all ~4400  
552 genes screened

553  $S_{amp2}$  = relative frequency of genes showing sensitivity to AMP2 out of all the  
554 ~4400 genes screened.

555

556 **Gene-ontology (GO) enrichment analysis.** To determine which Gene-ontology (GO) terms are  
557 significantly enriched in the resistant and sensitive genes, we employed the Biological Networks  
558 Gene Ontology tool (BiNGO)<sup>66</sup>. The selection of GO reference set was based on the EcoGene  
559 database<sup>67</sup>. The Benjamini-Hochberg FDR (FDR cutoff= 0.05) was used for multiple-testing  
560 correction<sup>68</sup>. GO categories showing FDR-corrected P-values < 0.05 were considered statisti-  
561 cally significant. Detailed information about the significantly enriched GO categories is pro-  
562 vided in Supplementary Table 7.

563 We calculated the enrichment of phospholipid and lipopolysaccharide transport/binding  
564 functions among the set of *E. coli* genes that were mutated in HBD-3-adapted lines. The same  
565 enrichment analysis was also carried out for those genes that showed collateral sensitivity.  
566 Genes related to phospholipid and lipopolysaccharide transport/binding function were selected  
567 from a previous study<sup>27</sup>.

568 **Determination of minimum inhibitory concentration (MIC).** Minimum inhibitory concentrations  
569 (MIC) were determined with a standard serial broth dilution technique<sup>69</sup>. Briefly, from a stock so-  
570 lution of an AMP, 12-steps serial dilution was prepared in fresh MS medium in 96-well microtiter  
571 plates. Each AMP was represented in 11 different concentrations (3 wells/AMP concentra-  
572 tion/strain). Three wells contained only medium to check the growth in the absence of AMP. After  
573 overnight growth in MS medium supplemented with chloramphenicol, bacterial strains were di-  
574 luted 20-fold into fresh MS medium and grown until the cell density reached  $OD_{600} \sim 1$ . Cells were  
575 induced by 100  $\mu$ M of IPTG and incubated for 1 h at 30°C with continuous shaking at 300 rpm.  
576 Following incubation, approximately half-million cells were inoculated into the wells of the 96-well  
577 microtiter plate with a 96-pin replicator. We used three independent replicates for each strain and  
578 the corresponding control. Two rows in the 96-well plate contained only MS medium in order to  
579 obtain the background OD value of the medium. Plates were incubated at 30°C with continuous  
580 shaking at 300 rpm. After 20-24 h of incubation,  $OD_{600}$  values were measured in a microplate  
581 reader (Biotek Synergy 2). After background subtraction, MIC was determined as the lowest con-  
582 centration of AMP where the  $OD_{600}$  values were less than 0.05.

583  
584 **Membrane surface charge measurement.** To evaluate bacterial surface charge, we performed  
585 a fluorescein isothiocyanate-labeled poly-L-lysine (FITC-PLL) (Sigma) binding assay. In brief,  
586 FITC-PLL is a polycationic molecule that binds to anionic lipid membrane in a charge-dependent  
587 manner and is used to investigate the interaction between cationic peptides and charged lipid  
588 bilayer membranes<sup>70,71</sup>. The assay was performed as previously described<sup>27,70</sup>. Briefly, bacterial  
589 cells were grown overnight in MS medium, centrifuged and washed twice with 1X PBS buffer (pH  
590 7.4). The washed bacterial cells were re-suspended in 1XPBS buffer to a final  $OD_{600}$  of 0.1. A  
591 freshly prepared FITC-PLL solution was added to the bacterial suspension at a final concentration  
592 of 6.5  $\mu$ g/ml. The suspension was incubated at room temperature for 10 minutes, and pelleted by  
593 centrifugation. The remaining amount of FITC-PLL in the supernatant was determined fluoromet-  
594 rically (excitation at 500 nm and emission at 530 nm) with or without bacterial exposure. The  
595 quantity of bound molecules was calculated from the difference between these values. A lower  
596 binding of FITC-PLL indicates a less net negative surface charge of the outer bacterial membrane.

597  
598 **Membrane potential measurement.** A previously described protocol<sup>37</sup> was used to determine  
599 the change in transmembrane potential for *mldA* overexpression, *mldA* knockout and A342*mldA*\*  
600 mutant strains in comparison to their control strain. Transmembrane potential ( $\Delta\psi$ ) was measured  
601 using the BacLight™ Bacterial Membrane Potential Kit (Invitrogen). In this assay, a fluorescent

602 membrane potential indicator dye emits green fluorescence in all bacterial cells and the emission  
603 shifts to red in the cells that maintain a high membrane potential. In this way, the ratio of red/green  
604 fluorescence provides a measure of membrane potential. Prior to the measurement bacterial cells  
605 were grown overnight in MS medium at 30°C. The overnight cultures were diluted into fresh MS  
606 medium and grown until cell density reached OD<sub>600</sub> 0.5-0.6. The grown cultures were diluted to  
607 10<sup>6</sup> cells/mL in filtered PBS buffer. Then, 5 µl of 3 mM DiOC<sub>2</sub>(3) was added to each sample tube  
608 containing 500 µl of bacterial suspension and incubated for 20 minutes at room temperature.  
609 Following incubation, red to green fluorescence values of the samples were measured using Flu-  
610 orescence Activated Cell Sorter (BD Facscalibur) according to the instructions of the kit's manu-  
611 facturer. Fluorescence values were calculated relative to the control strain. Control populations  
612 treated with cyanide-m-chlorophenylhydrazone (CCCP, a chemical inhibitor of proton motive  
613 force) were used as an experimental control.

614  
615 **Experimental evolution of resistance.** Adaptive laboratory evolution experiment was performed  
616 using a previously established automated evolution experiment protocol<sup>127,72</sup>. Briefly, starting from  
617 a single clone of *E. coli* BW25113, 10 parallel cultures were grown in the presence of sub-inhibi-  
618 tory concentration of HBD-3. A chess-board layout was used on the plate to monitor cross-con-  
619 tamination events. Each culture was allowed to grow for 24 h. Following incubation 20 µl of the  
620 grown culture was transferred to four independent wells containing fresh MS medium and increas-  
621 ing dosages of HBD-3 (0.5x, 1x, 1.5x and 2.5x the concentration of the previous step). Prior to  
622 each transfer, cell growth was monitored by measuring the optical density at 600 nm. Only popu-  
623 lations of the highest drug concentration that reached OD<sub>600</sub> > 0.2 were selected for further evo-  
624 lution. Accordingly, only the population of one of the four wells was retained for each inde-  
625 pendently evolving lineage. This protocol was designed to avoid population extinction and to en-  
626 sure that populations with the highest level of resistance were propagated further during evolution.  
627 The experimental evolution was maintained through 20 transfers. Following that, MIC values of  
628 HBD-3 were determined for all evolved lineages.

629  
630 **Whole-genome sequencing of HBD-3-evolved lines.** To identify potential mechanisms confer-  
631 ring resistance to the human beta-defensin-3 (HBD-3), 4 out of 10 adapted lines were subjected  
632 to whole-genome sequencing. Isolation of bacterial genomic DNA was performed using Sigma  
633 GenElute™ Bacterial Genomic DNA Kit and quantified using Qubit dsDNA BR assay in a Qubit  
634 2.0 fluorometer (Invitrogen). 200 ng of genomic DNA was fragmented in a Covaris M220 focused-

635 ultrasonicator (peak power: 55W, duty factor: 20%, 200 cycles/burst, duration: 45 sec) using Co-  
636 varis AFA screw cap fiber microTUBEs. Fragment size distribution was analyzed by capillary gel  
637 electrophoresis using Agilent High Sensitivity DNA kit in a Bioanalyzer 2100 instrument (Agilent)  
638 then indexed sequencing libraries were prepared using TruSeq Nano DNA LT kit (Illumina) fol-  
639 lowing the manufacturer's protocol. This, in short, includes end repair of DNA fragments, fragment  
640 size selection, ligation of indexed adapters and library enrichment with limited-cycle PCR. Se-  
641 quencing libraries were validated (library sizes determined) using Agilent High Sensitivity DNA kit  
642 in a Bioanalyzer 2100 instrument then quantitated using qPCR based NEBNext Library Quant Kit  
643 for Illumina (New England Biolabs) with a Piko-Real Real-Time PCR System (Thermo Fisher Sci-  
644 entific) and diluted to 4 nM concentration. Groups of 12 indexed libraries were pooled, denatured  
645 with 0.1 N NaOH and after dilution loaded in a MiSeq Reagent kit V2-500 (Illumina) at 8 pM  
646 concentration. 2X250 bp pair-end sequencing was done with an Illumina MiSeq sequencer, pri-  
647 mary sequence analysis was done on BaseSpace cloud computing environment with Generate-  
648 FASTQ 2.20.2 workflow. Paired end sequencing data were exported in FASTQ file format. The  
649 reads were trimmed using Trim Galore and cutadapt to remove adapters and bases where the  
650 PHRED quality value was less than 20. Trimmed sequences were removed if they became shorter  
651 than 150 bases. FASTQC program (<https://www.bioinformatics.babraham.ac.uk/projects/fastqc/>)  
652 was used to evaluate the qualities of original and trimmed reads. The Breseq program was used  
653 with default parameters for all samples<sup>73</sup>. The gdttools package was used for annotating the effects  
654 of mutations and comparing multiple samples. The genbank formatted reference genome  
655 BW25113.gb was used as a reference genome in the analysis.

656  
657 ***miaD* knockout and A342*miaD*\* mutant construction.** A *miaD* knockout strain of *E. coli*  
658 BW25113 carrying a kanamycin resistance cassette in the position of the gene was selected from  
659 the KEIO collection<sup>74</sup>. The resistance marker was removed using plasmid borne (pFT-A) expres-  
660 sion of FLP recombinase leading to excision of the kanamycin resistance cassette<sup>75</sup>. Cassette  
661 excision was verified by a polymerase chain reaction using the primers *miaD*\_del\_ver\_Fw (5'-  
662 TCACGGTGACGTGGATTTTC) and *miaD*\_del\_ver\_Rev (5'- GCCTCGTCCATCAGCTTATAC).  
663 The identified single nucleotide deletion<sup>73</sup> at position 342 within the *miaD* gene was constructed in  
664 *E. coli* BW25113. A well-established recombineering-based method employing pORTMAGE-2<sup>76</sup>  
665 was used to introduce the specific deletion. The *miaD*\_a342del ssDNA oligo (5'-A\*T\*TG  
666 TATCGCCATCCTTCAGGATAGCAGTCCCCAGTTCCGGGTCTTCAAACCGAC-  
667 GTTAATGCCAGATATTGTTCCCCCAGCAGGCC\*G\*G) was employed to introduce the specific

668 deletion (where \* denotes a phosphorothioate bond). Cells were then screened using allele-spe-  
669 cific PCR using the mlaD\_ASP (5'- GGAACAATATCTGGCATTAAACG) and mlaD\_Rev (5'-  
670 GTCATCGCCTTTACTACC) primer pair. Candidates were finally verified by Sanger sequencing  
671 using the mlaD\_Seq (5'-TACTGAACCGACCTACAC) primer paired with mlaD\_Rev.

## 672 **Acknowledgements**

673 We thank Roland Tengölics for his helpful discussion. This work was supported by the 'Lendület'  
674 programme of the Hungarian Academy of Sciences (B.P. and C.P.), the Wellcome Trust (B.P.),  
675 The European Research Council H2020-ERC-2014-CoG 648364- Resistance Evolution (C.P.),  
676 GINOP- 2.3.2-15-2016-00014 (EVOMER, C.P. and B.P.), GINOP-2.3.2-15-2016-00020  
677 (MolMedEx TUMORDNS, C.P.) and GINOP-2.3.2-15-2016-00026 (iChamber, B.P.), National Re-  
678 search, Development and Innovation Office, Hungary NKFIH grant K120220 (B.K.), NKFIH grant  
679 FK124254 (O.M.) and NKFIH grant KH125616 (B.P.), Natural Sciences and Engineering Re-  
680 search Discovery Grant 20234-2012 and Canadian Institutes of Health Research (CIHR) project  
681 grant 148831 (M.B). A.Ga. is supported by a CIHR Postdoctoral Fellowship. L.B. was supported  
682 by grant NKFI-112294. B.K. holds a Bolyai Janos Scholarship and supported by the UNKP-18-4  
683 New National Excellence Program of the Ministry of Human Capacities.

## 684 **Author contributions**

685 B.K., C.P. and B.P. conceived the project, B.K., P.K.J., G.F., C.P. and B.P. planned experiments  
686 and data analyses. P.K.J. and M.S. performed most experiments. R.S., L.D., A.M. and V.L. carried  
687 out laboratory evolution. I.N. was responsible to Solid and Illumina sequencing. A.F. and L.B.  
688 performed whole-genome sequencing of HBD-3-evolved lines. B.C. carried out mutagenesis.  
689 B.K., P.K.J., F.G., O.M., E.A. analyzed the experimental data. P.K.J., G.F. and A.G. carried out  
690 bioinformatic analyses. A.H., A.Ga. and S.K. created all essential hypomorphic alleles, and per-  
691 formed the chemical-genetic screening. S.P. quantified the colony growth fitness of the hypo-  
692 morphs, and analyzed the data with input from M.B. B.K., P.K.J., C.P., and B.P. wrote the manu-  
693 script.

## 694 **Competing interests**

695 I.N. had consulting positions at SeqOmics Biotechnology Ltd. at the time the study was conceived.  
696 SeqOmics Biotechnology Ltd. was not directly involved in the design and execution of the exper-  
697 iments or in the writing of the manuscript. This does not alter the author's adherence to sharing  
698 data and materials. The rest of the authors declare no competing interests.

699 **Data and code availability**

700

701 All data generated or analysed during this study are present in this article and its Supplementary  
702 Information files. For each figure, the availability of the analysed data is indicated in the figure  
703 legend. The Illumina and SOLiD sequencing data for the chemical-genetic screen will be available  
704 in the NCBI Sequence Read Archive, with SRA accession number XX. Any additional data can  
705 be requested from the corresponding author.

706 All scripts and other files needed to reproduce our analyses will be available at <https://github.com>  
707 before publication.

708

709

## 710 References

- 711 1. Brogden, K. A. Antimicrobial peptides: Pore formers or metabolic inhibitors in bacteria?  
712 *Nat. Rev. Microbiol.* **3**, 238–250 (2005).
- 713 2. Haney, E. F., Mansour, S. C. & Hancock, R. E. W. Antimicrobial Peptides: An Introduc-  
714 tion. *Methods Mol. Biol.* **1548**, 3–22 (2017).
- 715 3. Yeaman, M. R. Mechanisms of Antimicrobial Peptide Action and Resistance. *Pharmacol.*  
716 *Rev.* **55**, 27–55 (2003).
- 717 4. Hancock, R. E. W. & Sahl, H.-G. Antimicrobial and host-defense peptides as new anti-  
718 infective therapeutic strategies. *Nat. Biotechnol.* **24**, 1551–1557 (2006).
- 719 5. Mahlapuu, M., Håkansson, J., Ringstad, L. & Björn, C. Antimicrobial Peptides: An Emerg-  
720 ing Category of Therapeutic Agents. *Front. Cell. Infect. Microbiol.* **6**, 194 (2016).
- 721 6. Fleitas, O. & Franco, O. L. Induced Bacterial Cross-Resistance toward Host Antimicrobial  
722 Peptides: A Worrying Phenomenon. *Front. Microbiol.* **7**, 381 (2016).
- 723 7. Bell, G. Arming the enemy: the evolution of resistance to self-proteins. *Microbiology* **149**,  
724 1367–1375 (2003).
- 725 8. Nizet, V. Antimicrobial peptide resistance mechanisms of human bacterial pathogens.  
726 *Curr. Issues Mol. Biol.* **8**, 11–26 (2006).
- 727 9. Andersson, D. I., Hughes, D. & Kubicek-Sutherland, J. Z. Mechanisms and conse-  
728 quences of bacterial resistance to antimicrobial peptides. *Drug Resist. Updat.* **26**, 43–57  
729 (2016).
- 730 10. Bahar, A. & Ren, D. Antimicrobial Peptides. *Pharmaceuticals* **6**, 1543–1575 (2013).
- 731 11. Le, C.-F., Fang, C.-M. & Sekaran, S. D. Intracellular Targeting Mechanisms by  
732 Antimicrobial Peptides. *Antimicrob. Agents Chemother.* **61**, (2017).
- 733 12. Cacace, E., Kritikos, G. & Typas, A. Chemical genetics in drug discovery. *Curr. Opin.*  
734 *Syst. Biol.* **4**, 35–42 (2017).
- 735 13. Bredel, M. & Jacoby, E. Chemogenomics: an emerging strategy for rapid target and drug  
736 discovery. *Nat. Rev. Genet.* **5**, 262–275 (2004).
- 737 14. Lehár, J., Stockwell, B. R., Giaever, G. & Nislow, C. Combination chemical genetics. *Nat.*  
738 *Chem. Biol.* **4**, 674–681 (2008).
- 739 15. Ho, C. H. *et al.* A molecular barcoded yeast ORF library enables mode-of-action analysis  
740 of bioactive compounds. *Nat. Biotechnol.* **27**, 369–377 (2009).
- 741 16. Nichols, R. J. *et al.* Phenotypic Landscape of a Bacterial Cell. *Cell* **144**, 143–156 (2011).
- 742 17. Lee, A. Y. *et al.* Mapping the Cellular Response to Small Molecules Using Chemoge-  
743 nomic Fitness Signatures. *Science.* **344**, 208–211 (2014).



- 744 18. Girgis, H. S., Hottes, A. K. & Tavazoie, S. Genetic architecture of intrinsic antibiotic sus-  
745 ceptibility. *PLoS One* **4**, e5629 (2009).
- 746 19. Lázár, V. *et al.* Genome-wide analysis captures the determinants of the antibiotic cross-  
747 resistance interaction network. *Nat. Commun.* **5**, 4352 (2014).
- 748 20. Babu, M., Gagarinova, A. & Emili, A. Array-Based Synthetic Genetic Screens to Map  
749 Bacterial Pathways and Functional Networks in *Escherichia coli*. in *Methods in Molecular*  
750 *Biology* 99–126 (2011).
- 751 21. Babu, M. *et al.* Genetic Interaction Maps in *Escherichia coli* Reveal Functional Crosstalk  
752 among Cell Envelope Biogenesis Pathways. *PLoS Genet.* **7**, e1002377 (2011).
- 753 22. Kumar, A. *et al.* Conditional Epistatic Interaction Maps Reveal Global Functional Rewiring  
754 of Genome Integrity Pathways in *Escherichia coli*. *Cell Rep.* **14**, 648–661 (2016).
- 755 23. Kitagawa, M. *et al.* Complete set of ORF clones of *Escherichia coli* ASKA library (A Com-  
756 plete Set of *E. coli* K-12 ORF Archive): Unique Resources for Biological Research. *DNA*  
757 *Res.* **12**, 291–299 (2006).
- 758 24. Soo, V. W. C., Hanson-Manful, P. & Patrick, W. M. Artificial gene amplification reveals an  
759 abundance of promiscuous resistance determinants in *Escherichia coli*. *Proc. Natl. Acad.*  
760 *Sci.* **108**, 1484–1489 (2011).
- 761 25. Pathania, R. *et al.* Chemical genomics in *Escherichia coli* identifies an inhibitor of bacte-  
762 rial lipoprotein targeting. *Nat. Chem. Biol.* **5**, 849–856 (2009).
- 763 26. Palmer, A. C., Chait, R. & Kishony, R. Nonoptimal Gene Expression Creates Latent Po-  
764 tential for Antibiotic Resistance. *Mol. Biol. Evol.* **35**, 2669–2684 (2018).
- 765 27. Lázár, V. *et al.* Antibiotic-resistant bacteria show widespread collateral sensitivity to anti-  
766 microbial peptides. *Nat. Microbiol.* **3**, 718–731 (2018).
- 767 28. Galardini, M. *et al.* Phenotype inference in an *Escherichia coli* strain panel. *Elife* **6**,  
768 (2017).
- 769 29. Torrent, M., Andreu, D., Nogués, V. M. & Boix, E. Connecting Peptide Physicochemical  
770 and Antimicrobial Properties by a Rational Prediction Model. *PLoS One* **6**, e16968  
771 (2011).
- 772 30. Dathe, M. & Wieprecht, T. Structural features of helical antimicrobial peptides: their po-  
773 tential to modulate activity on model membranes and biological cells. *Biochim. Biophys.*  
774 *Acta - Biomembr.* **1462**, 71–87 (1999).
- 775 31. Gerstel, U. *et al.* Hornerin contains a Linked Series of Ribosome-Targeting Peptide Anti-  
776 biotics. *Sci. Rep.* **8**, 16158 (2018).

- 777 32. Hu, P. *et al.* Global Functional Atlas of Escherichia coli Encompassing Previously Un-  
778 characterized Proteins. *PLoS Biol.* **7**, e1000096 (2009).
- 779 33. Gagarinova, A. *et al.* Systematic Genetic Screens Reveal the Dynamic Global Functional  
780 Organization of the Bacterial Translation Machinery. *Cell Rep.* (2016).  
781 doi:10.1016/j.celrep.2016.09.040
- 782 34. Hoon, S. *et al.* An integrated platform of genomic assays reveals small-molecule bioactiv-  
783 ities. *Nat. Chem. Biol.* **4**, 498–506 (2008).
- 784 35. Ho, Y.-H., Shah, P., Chen, Y.-W. & Chen, C.-S. Systematic Analysis of Intracellular-tar-  
785 geting Antimicrobial Peptides, Bactenecin 7, Hybrid of Pleurocidin and Dermaseptin, Pro-  
786 line–Arginine-rich Peptide, and Lactoferricin B, by Using Escherichia coli Proteome  
787 Microarrays. *Mol. Cell. Proteomics* **15**, 1837–1847 (2016).
- 788 36. Ramos, P. I. P. *et al.* An integrative, multi-omics approach towards the prioritization of  
789 Klebsiella pneumoniae drug targets. *Sci. Rep.* **8**, 10755 (2018).
- 790 37. Lazar, V. *et al.* Bacterial evolution of antibiotic hypersensitivity. *Mol. Syst. Biol.* **9**, 700–  
791 700 (2014).
- 792 38. Imamovic, L. & Sommer, M. O. A. Use of Collateral Sensitivity Networks to Design Drug  
793 Cycling Protocols That Avoid Resistance Development. *Sci. Transl. Med.* **5**, 204ra132-  
794 204ra132 (2013).
- 795 39. Malinverni, J. C. & Silhavy, T. J. An ABC transport system that maintains lipid asymmetry  
796 in the Gram-negative outer membrane. *Proc. Natl. Acad. Sci.* **106**, 8009–8014 (2009).
- 797 40. Nakamura, S. *et al.* Molecular Basis of Increased Serum Resistance among Pulmonary  
798 Isolates of Non-typeable Haemophilus influenzae. *PLoS Pathog.* **7**, e1001247 (2011).
- 799 41. Ekiert, D. C. *et al.* Architectures of Lipid Transport Systems for the Bacterial Outer Mem-  
800 brane. *Cell* **169**, 273–285.e17 (2017).
- 801 42. Roier, S. *et al.* A novel mechanism for the biogenesis of outer membrane vesicles in  
802 Gram-negative bacteria. *Nat. Commun.* **7**, 10515 (2016).
- 803 43. Prelich, G. Gene Overexpression: Uses, Mechanisms, and Interpretation. *Genetics* **190**,  
804 841–854 (2012).
- 805 44. Papp, B., Pál, C. & Hurst, L. D. Dosage sensitivity and the evolution of gene families in  
806 yeast. *Nature* **424**, 194–197 (2003).
- 807 45. Strahl, H. & Hamoen, L. W. Membrane potential is important for bacterial cell division.  
808 *Proc. Natl. Acad. Sci.* **107**, 12281–12286 (2010).
- 809 46. Falla, T. J., Karunaratne, D. N. & Hancock, R. E. W. Mode of Action of the Antimicrobial  
810 Peptide Indolicidin. *J. Biol. Chem.* **271**, 19298–19303 (1996).

- 811 47. Aspedon, A. & Groisman, E. A. The antibacterial action of protamine: evidence for disruption of cytoplasmic membrane energization in *Salmonella typhimurium*. *Microbiology* **142**, 3389–3397 (1996).  
812  
813
- 814 48. Li, W. *et al.* Proline-rich antimicrobial peptides: potential therapeutics against antibiotic-resistant bacteria. *Amino Acids* **46**, 2287–2294 (2014).  
815
- 816 49. Vitali, A. Proline-rich peptides: multifunctional bioactive molecules as new potential therapeutic drugs. *Curr. Protein Pept. Sci.* **16**, 147–62 (2015).  
817
- 818 50. Oppenheim, F. G., Hay, D. I. & Franzblau, C. Proline-rich proteins from human parotid saliva. I. Isolation and partial characterization. *Biochemistry* **10**, 4233–4238 (1971).  
819
- 820 51. Notebaart, R. A. *et al.* Network-level architecture and the evolutionary potential of underground metabolism. *Proc. Natl. Acad. Sci.* **111**, 11762–11767 (2014).  
821
- 822 52. Pierce, S. E., Davis, R. W., Nislow, C. & Giaever, G. Genome-wide analysis of barcoded *Saccharomyces cerevisiae* gene-deletion mutants in pooled cultures. *Nat. Protoc.* **2**, 2958–2974 (2007).  
823  
824
- 825 53. Robinson, D. G., Chen, W., Storey, J. D. & Gresham, D. Design and Analysis of Bar-seq Experiments. *G3&#58; Genes/Genomes/Genetics* **4**, 11–18 (2014).  
826
- 827 54. Rocke, D. M. & Durbin, B. Approximate variance-stabilizing transformations for gene-expression microarray data. *Bioinformatics* **19**, 966–972 (2003).  
828
- 829 55. Ronan, T., Qi, Z. & Naegle, K. M. Avoiding common pitfalls when clustering biological data. *Sci. Signal.* **9**, re6 (2016).  
830
- 831 56. Breslow, D. K. *et al.* A comprehensive strategy enabling high-resolution functional analysis of the yeast genome. *Nat. Methods* **5**, 711–718 (2008).  
832
- 833 57. Babu, M. *et al.* Global landscape of cell envelope protein complexes in *Escherichia coli*. *Nat. Biotechnol.* **36**, 103–112 (2017).  
834
- 835 58. Butland, G. *et al.* eSGA: *E. coli* synthetic genetic array analysis. *Nat. Methods* **5**, 789–795 (2008).  
836
- 837 59. Babu, M. *et al.* Quantitative Genome-Wide Genetic Interaction Screens Reveal Global Epistatic Relationships of Protein Complexes in *Escherichia coli*. *PLoS Genet.* **10**, e1004120 (2014).  
838  
839
- 840 60. Wagih, O. & Parts, L. gitter: A Robust and Accurate Method for Quantification of Colony Sizes From Plate Images. *G3&#58; Genes/Genomes/Genetics* **4**, 547–552 (2014).  
841
- 842 61. Wagih, O. *et al.* SGAtools: one-stop analysis and visualization of array-based genetic interaction screens. *Nucleic Acids Res.* **41**, W591–W596 (2013).  
843
- 844 62. Osorio, D., Rondón-Villarreal, P., Torres, R., Rondon-Villarreal, P. & Torres, R. Peptides :

- 845 A Package for Data Mining of Antimicrobial Peptides. *R J.* (2012).  
846 doi:10.1080/07294360701658781
- 847 63. Gasteiger, E. *et al.* Protein Identification and Analysis Tools on the ExpASY Server. in  
848 *The Proteomics Protocols Handbook* 571–607 (Humana Press, 2005). doi:10.1385/1-  
849 59259-890-0:571
- 850 64. Team, R. D. C. & R Development Core Team, R. R: A Language and Environment for  
851 Statistical Computing. *R Found. Stat. Comput.* (2016). doi:10.1007/978-3-540-74686-7
- 852 65. Team, Rs. RStudio: Integrated Development for R. [Online] *RStudio, Inc., Boston, MA*  
853 URL <http://www.rstudio.com> (2015). doi:<https://www.nrel.gov/docs/fy16osti/65298.pdf>
- 854 66. Maere, S., Heymans, K. & Kuiper, M. BiNGO: a Cytoscape plugin to assess overrepre-  
855 sentation of Gene Ontology categories in Biological Networks. *Bioinformatics* **21**, 3448–  
856 3449 (2005).
- 857 67. Zhou, J. & Rudd, K. E. EcoGene 3.0. *Nucleic Acids Res.* **41**, D613–D624 (2012).
- 858 68. Hochberg, B. Controlling the False Discovery Rate: a Practical and Powerful Approach to  
859 Multiple Testing. *J. R. Stat. Soc.* (1995). doi:10.2307/2346101
- 860 69. Wiegand, I., Hilpert, K. & Hancock, R. E. W. Agar and broth dilution methods to deter-  
861 mine the minimal inhibitory concentration (MIC) of antimicrobial substances. *Nat. Protoc.*  
862 **3**, 163–175 (2008).
- 863 70. Peschel, A. *et al.* Inactivation of the *dlt* Operon in *Staphylococcus aureus* Confers Sensi-  
864 tivity to Defensins, Protegrins, and Other Antimicrobial Peptides. *J. Biol. Chem.* **274**,  
865 8405–8410 (1999).
- 866 71. Rossetti, F. F. *et al.* Interaction of Poly(L-Lysine)-g-Poly(Ethylene Glycol) with Supported  
867 Phospholipid Bilayers. *Biophys. J.* **87**, 1711–1721 (2004).
- 868 72. Bódi, Z. *et al.* Phenotypic heterogeneity promotes adaptive evolution. *PLoS Biol.* **15**,  
869 e2000644 (2017).
- 870 73. Deatherage, D. E. & Barrick, J. E. Identification of Mutations in Laboratory-Evolved Mi-  
871 crobes from Next-Generation Sequencing Data Using breseq. in *Methods in Molecular*  
872 *Biology* 165–188 (2014). doi:10.1007/978-1-4939-0554-6\_12
- 873 74. Baba, T. *et al.* Construction of *Escherichia coli* K-12 in-frame, single-gene knockout mu-  
874 tants: the Keio collection. *Mol. Syst. Biol.* **2**, 2006.0008 (2006).
- 875 75. Pósfai, G., Koob, M. D., Kirkpatrick, H. A. & Blattner, F. R. Versatile insertion plasmids for  
876 targeted genome manipulations in bacteria: isolation, deletion, and rescue of the patho-  
877 genicity island LEE of the *Escherichia coli* O157:H7 genome. *J. Bacteriol.* **179**, 4426–  
878 4428 (1997).

- 879 76. Nyerges, Á. *et al.* A highly precise and portable genome engineering method allows com-  
880 parison of mutational effects across bacterial species. *Proc. Natl. Acad. Sci.* **113**, 2502–  
881 2507 (2016).

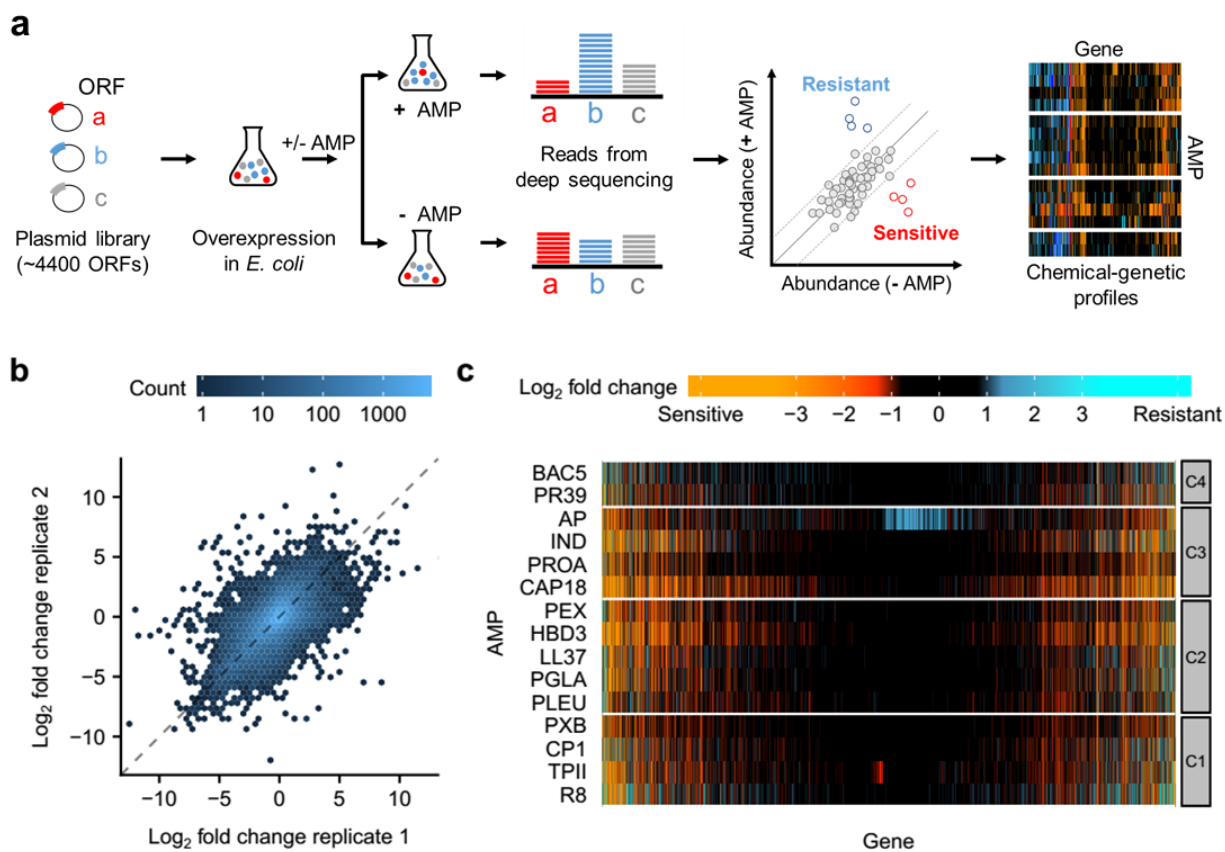

882  
883  
884  
885  
886  
887  
888  
889  
890  
891  
892  
893

**Figure 1. Chemical-genetic profiling of AMPs.** **a**, Schematic representation of the chemical-genetic pipeline. The chemical-genetic interactions of ~4,400 single gene-overexpressions and 15 different AMPs were measured using a pooled fitness assay with a deep sequencing readout (see Methods). **b**, A density scatter plot showing the overall correlation of replicate measurements of the chemical-genetic scores (log<sub>2</sub> fold-change in the relative abundance of each gene in the presence vs absence of each AMP) across all genes and AMPs ( $r = 0.63$  and  $P = 2.2 \times 10^{-16}$ , Pearson's correlation,  $n = 53,292$ ). **c**, Heatmap showing the chemical-genetic interaction scores. Resistant and sensitive interactions are represented by blue and red, respectively ( $n = 66,615$ ). Groups C1-C4 refer to clusters defined in Figure 2. Data is provided in Supplementary Table 2.

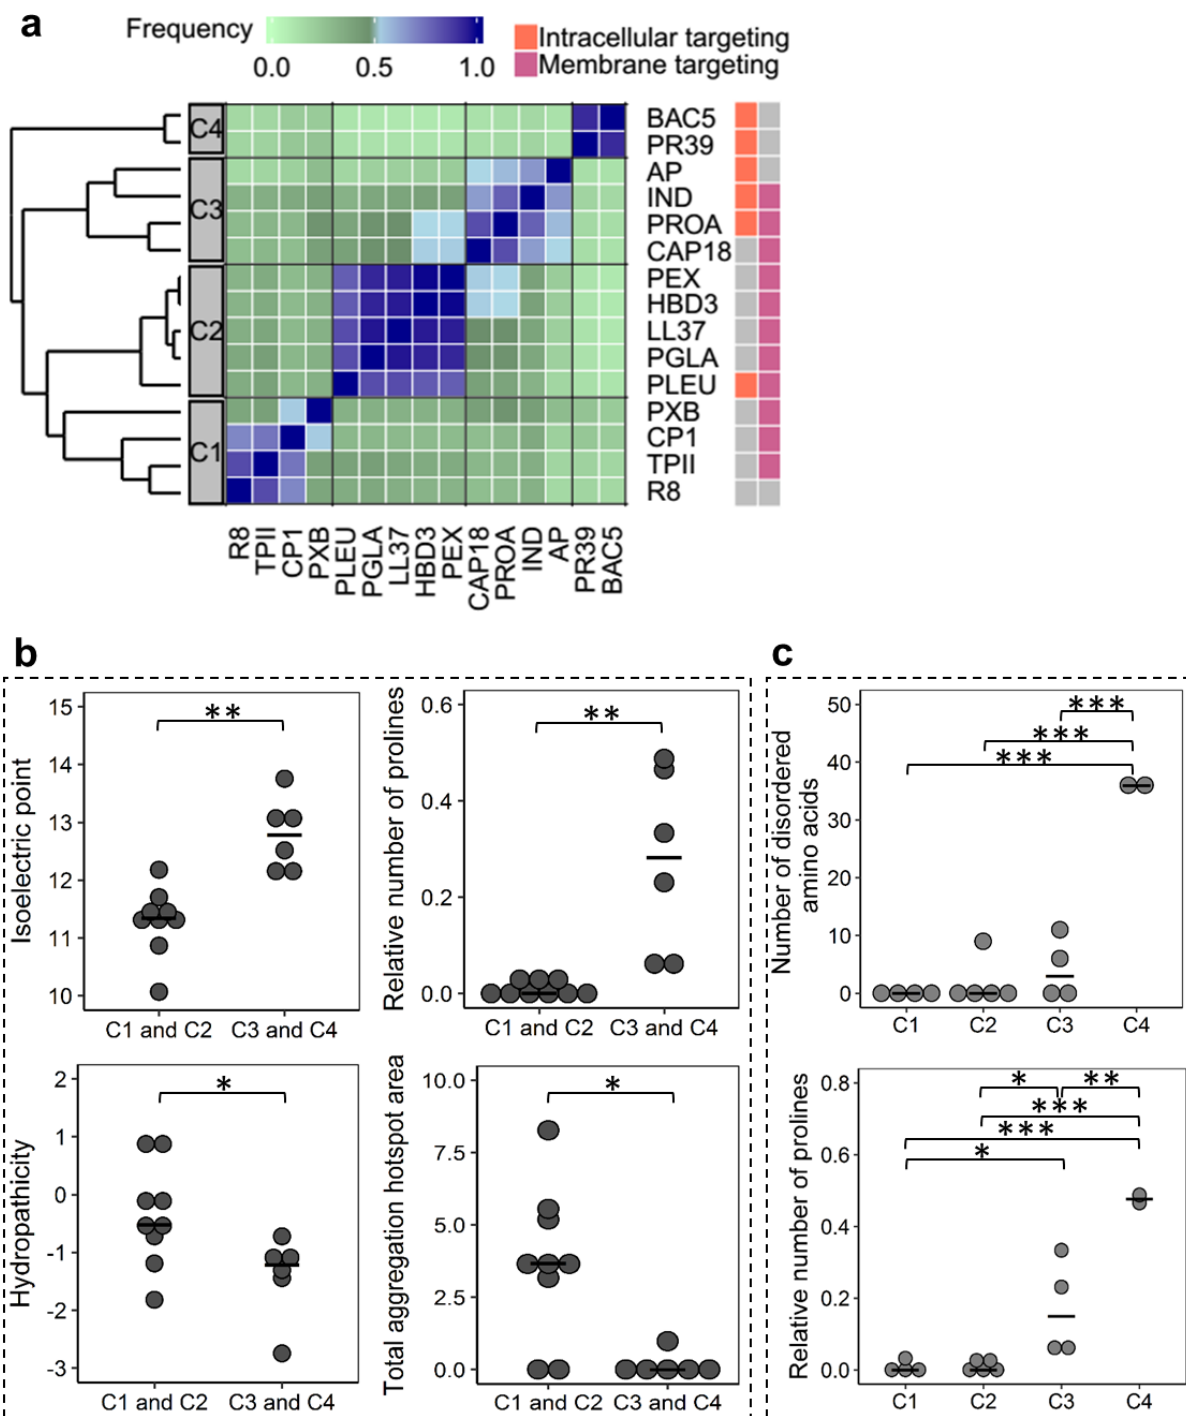

894  
895

896 **Figure 2. Chemical-genetic profiling discriminates membrane-targeting and intracellular-**  
 897 **targeting AMPs with distinct physicochemical properties.** **a**, Heatmap showing the ensemble  
 898 clustering of the AMPs based on their chemical-genetic profiles (see Methods). For each AMP  
 899 pair, the color code represents the frequency of being closest neighbours across the ensemble of

900 clusters ( $n = 75,000$  clustering). The four major clusters are labelled as C1, C2, C3, and C4.  
901 Membrane-targeting and intracellular-targeting broad modes of action are labelled with pink and  
902 orange, respectively, on the rightmost side of the figure. Grey color indicates that the specific  
903 broad mode of action has not been detected or not tested (see Table 1). References describing  
904 these activities are provided in Supplementary Table 10. **b**, Most important physicochemical prop-  
905 erties that differentiated AMPs in cluster C1,C2 from AMPs in cluster C3,C4. Significant differ-  
906 ences: \*\*  $P = 0.0026$  and  $0.0012$  for isoelectric point and relative number of prolines, respectively,  
907 \*  $P = 0.0391$  and  $P = 0.0154$  for hydropathicity and total aggregation hotspot area, respectively,  
908 two-sided Mann–Whitney U test,  $n = 9$  and  $n = 6$  for C1,C2 and C3,C4, respectively. **c**, Physico-  
909 chemical properties that distinguished the clusters when the 4 main AMP clusters were consid-  
910 ered separately ( $p < 0.05$  ANOVA, Tukey post-hoc test,  $n = 15$ ). Significant differences: \*\*\*  $P =$   
911  $1.1 \cdot 10^{-6}$ ,  $P = 1.3 \cdot 10^{-6}$  and  $P = 4 \cdot 10^{-6}$  for C1 vs C4, C2 vs C4 and C3 vs C4, respectively in the  
912 case of number of disordered amino acids. \*  $P = 0.034$  and  $P = 0.027$  for C1 vs C3 and C2 vs C3,  
913 respectively. \*\*  $P = 0.0022$  for C3 vs C4. \*\*\*  $P = 5.5 \cdot 10^{-5}$  and  $P = 4.2 \cdot 10^{-5}$  for C1 vs C4 and C2 vs  
914 C4, respectively, in the case of relative number of prolines. Central horizontal bars represent  
915 median values. Data is provided in Supplementary Table 5.



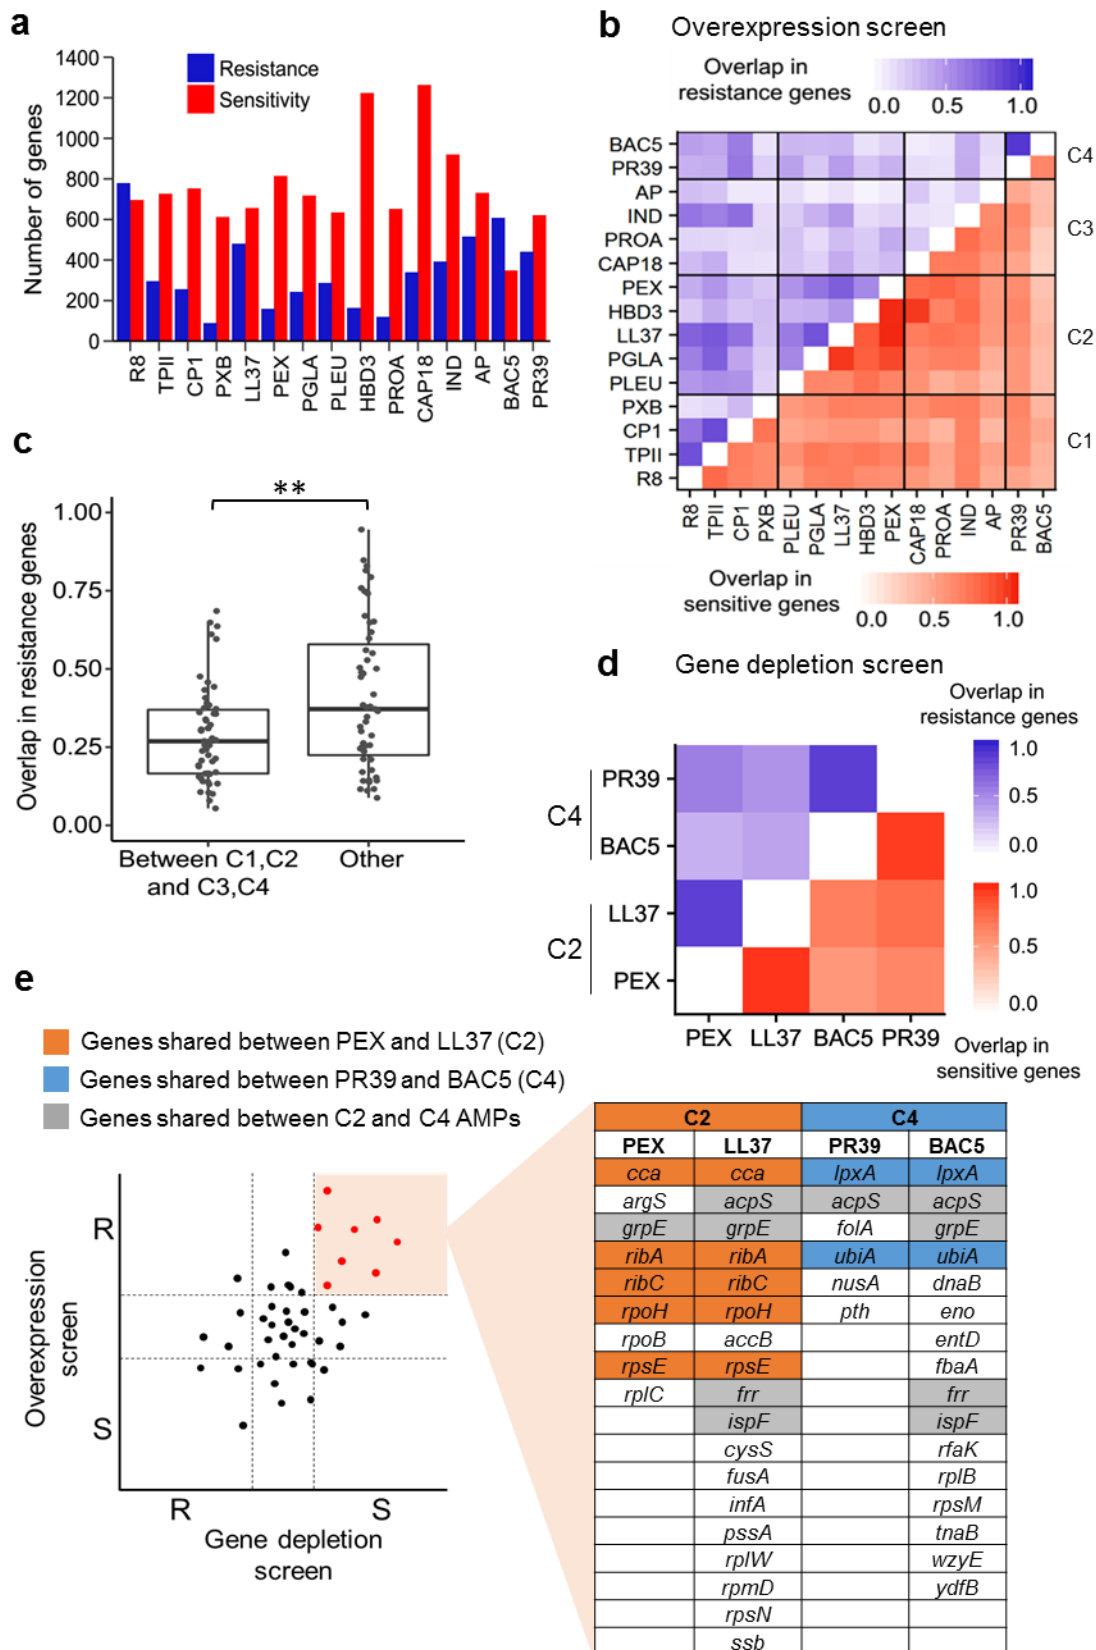

917 **Figure 3. Large and functionally diverse latent and intrinsic AMP resistomes.** **a**, Number of  
918 genes enhancing resistance and sensitivity for each AMP upon overexpression. Data is provided  
919 in Supplementary Table 2. **b**, Heatmap shows the corrected Jaccard similarity indices calculated  
920 for resistance- (blue) and sensitivity-conferring genes (red) between AMP pairs based on the  
921 overexpression screen (see Methods for calculation of corrected Jaccard indices,  $n = 210$ , that  
922 is, the number of AMP pairs used for calculating the Jaccard-similarity indices). The darker the  
923 color the higher the overlap of gene sets between AMP pairs. Data is provided in Supplementary  
924 Table 6. **c**, The overlaps in the latent resistomes (genes conferring resistance upon overexpres-  
925 sion) between AMP pairs belonging to different chemical-genetic clusters. Significant difference:  
926 \*\*  $P = 0.009$  from two-sided Mann–Whitney U test,  $n = 54$  and  $n = 51$  for between C1, C2 and C3,  
927 C4, and others, respectively. **d**, Heatmap shows the corrected Jaccard similarity indices calcu-  
928 lated for resistant (blue) and sensitive (red) chemical-genetic interactions with partially-depleted  
929 essential genes (see Methods). Data is provided in Supplementary Table 8. **e**, Sets of essential  
930 genes that simultaneously confer AMP resistance when overexpressed and sensitivity when de-  
931 pleted (red colored dots in the schematic plot). Color code is explained in the figure.  
932

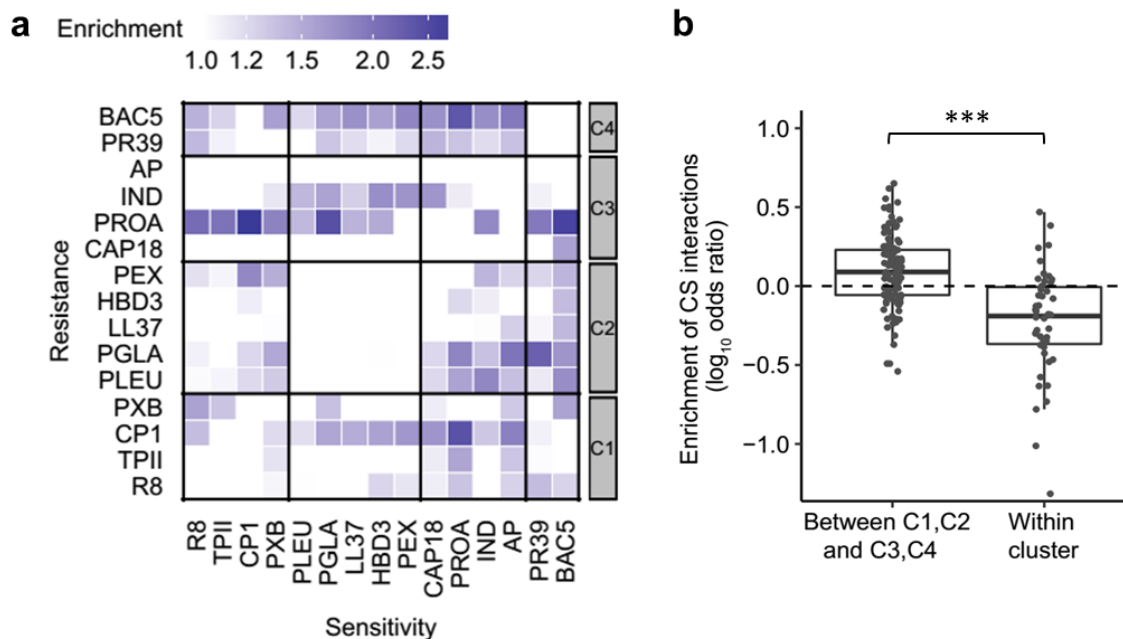

933

934

935 **Figure 4. Collateral sensitivity (CS) interactions are frequent between AMPs with different**

936 **modes of action. a**, Heatmap depicting the overrepresentation of collateral sensitivity-inducing

937 genes for each AMP pair over random expectation ( $n = 210$  AMP pairs). Random expectation is

938 calculated using the number of resistance and sensitive genes for each AMP (see Methods). **b**,

939 Collateral sensitivity effects were especially pronounced between AMP pairs with different broad

940 mechanism of action, that is, between membrane-targeting (C1, C2) and intracellular-targeting

941 (C3, C4), as compared to AMP pairs from the same cluster. Significant difference: \*\*\*  $P = 2.1 \cdot 10^{-$

942  $07$  from two-tailed unpaired  $t$ -test,  $n = 108$  and  $46$  for pairs of AMPs between C1, C2 and C3, C4,

943 and those within cluster, respectively. Y-axis shows odds ratio (log<sub>10</sub>) of enrichment of collateral

944 sensitivity interactions between AMP pairs. Data is provided in Supplementary Table 6.

945

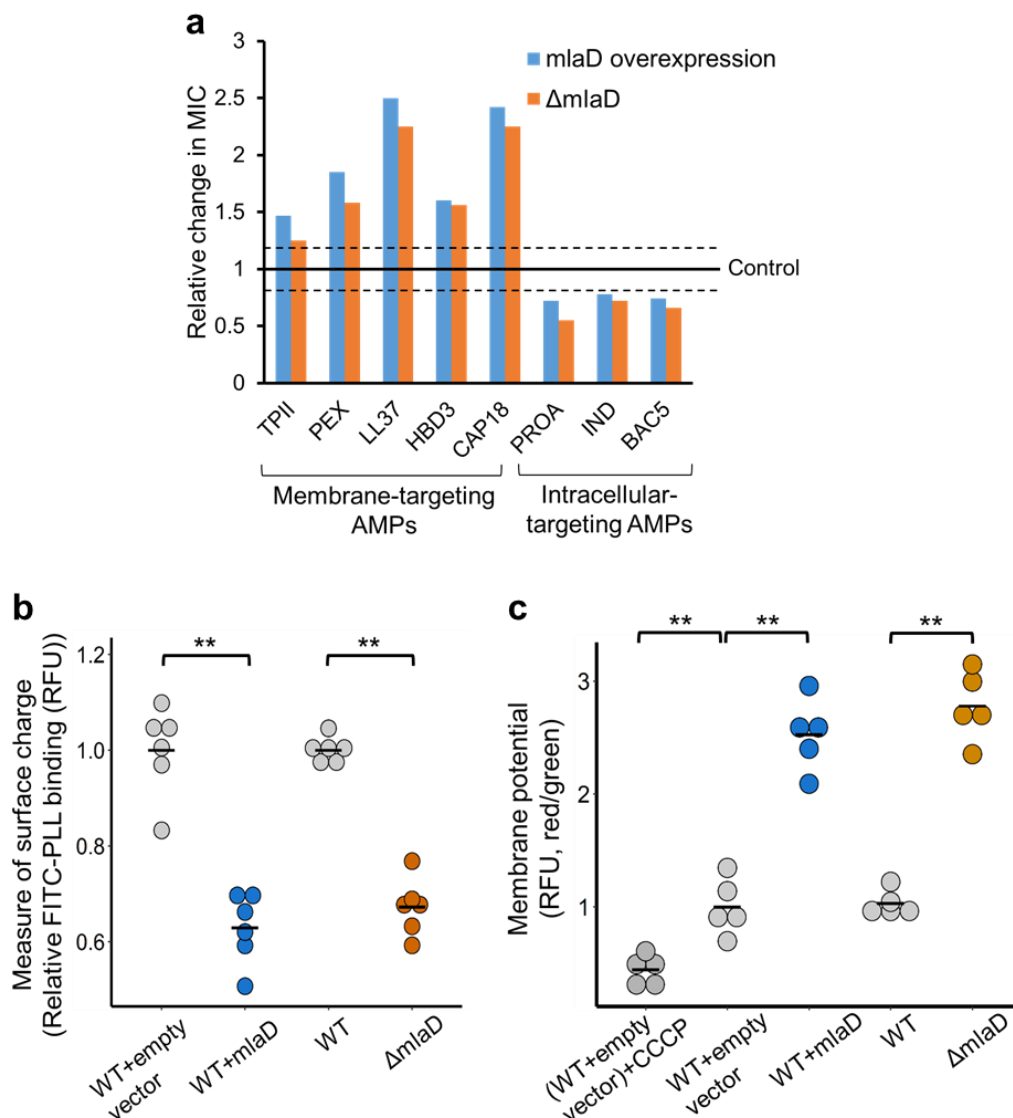

946

947

948 **Figure 5. Mutation in *mlaD* influences AMP susceptibilities through antagonistic**  
 949 **mutational effects. a**, Relative change in MICs of the *mlaD* overexpression and deletion strains  
 950 ( $\Delta mlaD$ ) to a representative set of membrane-targeting and intracellular-targeting AMPs. MICs  
 951 were compared to corresponding wild-type control strains (see Supplementary Figures 8 and 9).  
 952 Dashed lines represent previously defined cut-offs for resistance ( $\geq 1.2 \times$  MIC of the control) and  
 953 sensitivity ( $\leq 0.8 \times$  MIC of the control)<sup>27</sup>. **b**, Decreased net negative surface charge of the *mlaD*  
 954 overexpression and deletion strains. Significant differences: \*\*  $P = 0.0021$  and  $P = 0.0021$  for  
 955 WT+empty vector vs overexpression and WT vs deletion strain, respectively, from two-sided  
 956 Mann–Whitney U test,  $n = 6$  biological replicates for each genotype. Charge measurement was

957 done using FITC-labelled poly-L-lysine (FITC-PLL) assay where the fluorescence signal is pro-  
958 portional to the binding of the FITC-PLL molecules. A lower binding of FITC-PLL indicates a less  
959 net negative surface charge of the outer bacterial membrane (see Methods). **c**, Increased mem-  
960 brane potentials of the *mld* overexpression and deletion strains. Significant differences: \*\*  $P =$   
961  $0.007$ ,  $P = 0.0079$  and  $P = 0.0079$  for WT+empty vector CCCP control vs WT+empty vector,  
962 WT+empty vector vs WT+mld overexpression and WT vs.  $\Delta mld$ , respectively, two-sided  
963 Mann–Whitney U test,  $n = 5$  biological replicates for each genotype. Relative membrane potential  
964 was measured by determining relative fluorescence (RFU) using a carbocyanine dye DiOC2(3)  
965 assay (see Methods). Red/green ratios were calculated using population mean fluorescence in-  
966 tensities. WT *E. coli* carrying the empty vector treated with CCCP was used as an experimental  
967 control for diminished membrane potential. Raw data is in Supplementary Figure 13.

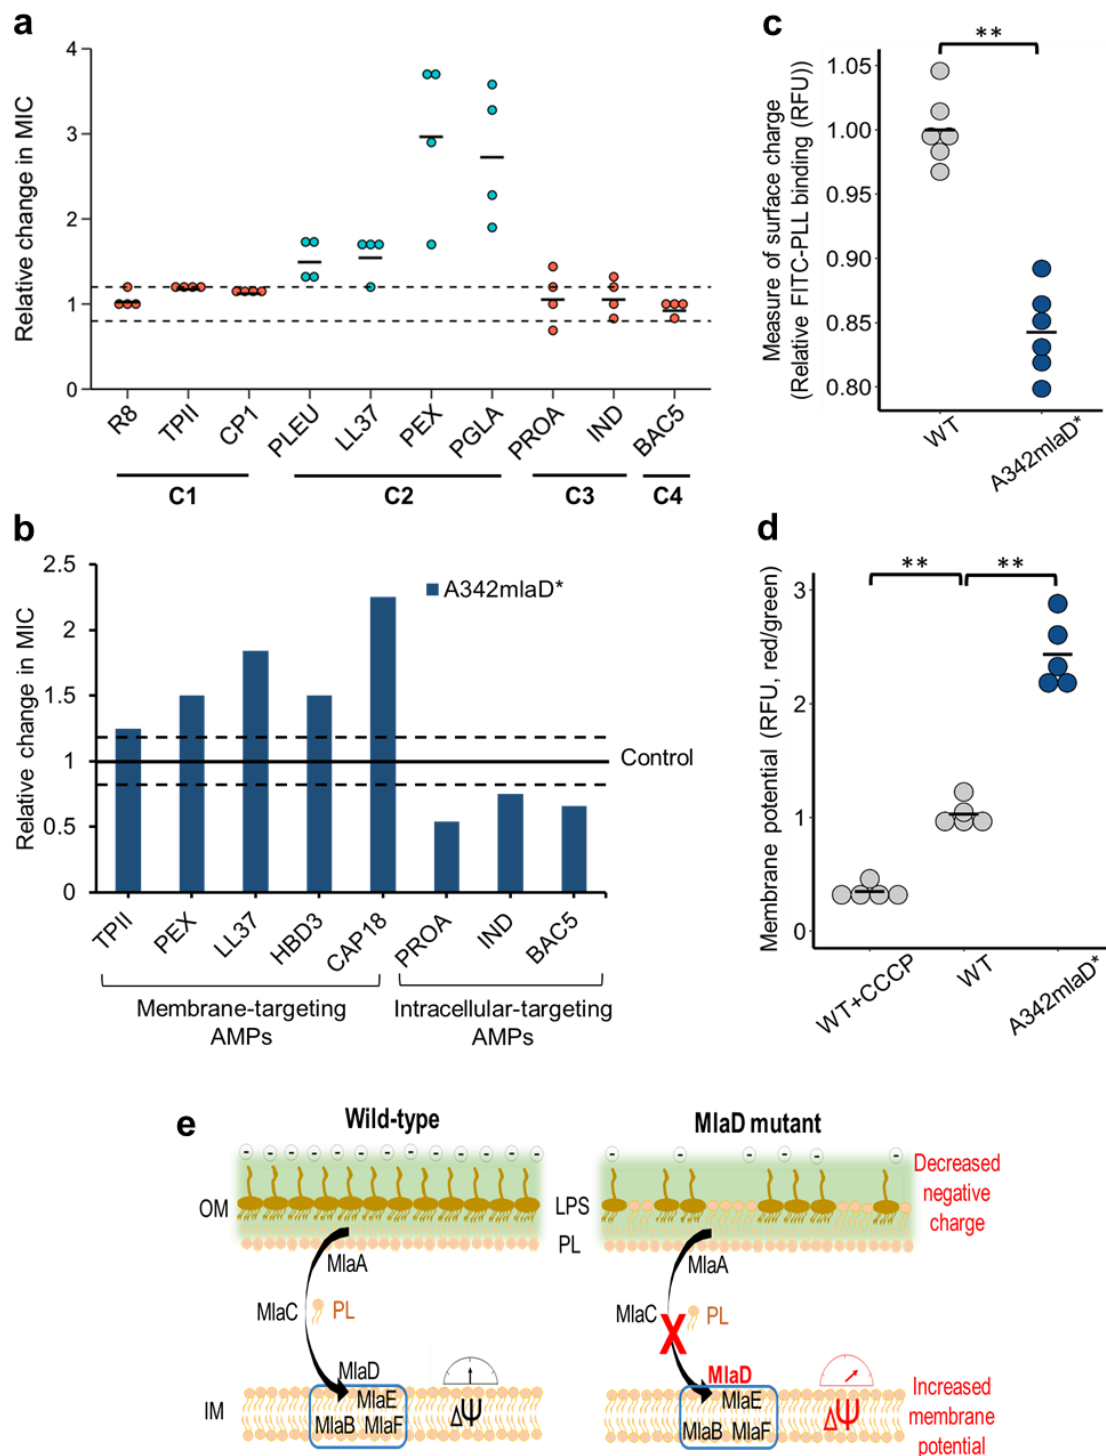

968

969

970 **Figure 6. Chemical-genetic profiles predict the cross-resistance spectrum of HBD-3. a,**  
 971 HBD-3-evolved lines showed cross-resistance almost exclusively to AMPs from the same chem-  
 972 ical-genetic cluster ( $P = 0.0003$ , two-sided Fisher's exact test,  $n = 16$  and  $24$  for AMPs from C2

973 (blue points) and from the rest of the clusters (red points), respectively). Relative MICs were de-  
974 termined for each of the 4 sequenced evolved lines by comparing their MICs to that of the ances-  
975 tral cell line (control). Dashed lines are previously defined cut-off values for cross-resistance ( $\geq 1.2$   
976 x MIC of the control) and collateral sensitivity ( $\leq 0.8$  x MIC of the control)<sup>27</sup>. Data is provided in  
977 Supplementary Table 11. **b**, Relative change in MICs of the A342mlaD\* mutant strain to a repre-  
978 sentative set of AMPs. MICs were compared to corresponding wild-type control strain (see Sup-  
979 plementary Figures 12). **c**, Decreased net negative surface charge of the A342mlaD\* mutant  
980 strain (significant difference: \*\*  $P = 0.0021$ , two-sided Mann–Whitney U test,  $n = 6$ ). **d**, Increased  
981 membrane potential of the A342mlaD\* mutant strain (significance differences: \*\*  $P = 0.0079$  and  
982  $P = 0.0079$  for WT+CCCP control vs WT strain and WT vs A342mlaD\* mutant, two-sided Mann–  
983 Whitney U test,  $n = 5$ ). WT *E. coli* treated with CCCP was used as a control for diminished mem-  
984 brane potential. **e**, Proposed molecular mechanism for the collateral sensitivity caused by the  
985 perturbation of *mld*. Accumulation of phospholipids in the outer membrane upon depletion of  
986 functional *mld* results in a decreased net negative surface charge which causes weaker elec-  
987 trostatic interaction between the bacterial membrane and the AMPs thereby providing resistance  
988 to membrane-targeting AMPs. At the same time, this mutation also increases membrane potential  
989 which drives the cellular uptake of certain intracellular-targeting peptides. Abbreviations: OM -  
990 outer membrane, IM - inner membrane, PL - phospholipid, LPS - lipopolysaccharides,  $\Delta\psi$  - mem-  
991 brane potential.

992

993

994 **Table 1.** List of AMPs used in this study, their abbreviation, described mode of action, and clinical  
 995 relevance (for details see Supplementary Table 10).  
 996

| <u>Name of AMP</u>            | <u>Abbreviation</u> | <u>Mode of action</u>                                                                           | <u>Clinical relevance</u> |
|-------------------------------|---------------------|-------------------------------------------------------------------------------------------------|---------------------------|
| Apidaecin IB                  | AP                  | Inhibits protein biosynthesis by targeting ribosomes;<br>Interacts with DnaK, GroEL/GroES, FtsH | Yes                       |
| Bactenecin 5                  | BAC5                | Inhibits protein and RNA synthesis                                                              | n.a.                      |
| CAP18                         | CAP18               | Disrupts cell membrane                                                                          | Yes                       |
| Cecropin P1                   | CP1                 | Disrupts cell membrane                                                                          | n.a.                      |
| Human beta-defensin-3         | HBD-3               | Disrupts cell membrane;<br>Inhibits lipid II in peptidoglycan biosynthesis                      | n.a.                      |
| Indolicidin                   | IND                 | Inhibits DNA and protein synthesis;<br>Disrupts cell membrane;<br>Inhibits septum formation     | Yes                       |
| LL-37 human cathelicidin      | LL37                | Disrupts cell membrane;<br>Induces ROS formation                                                | Yes                       |
| Peptide glycine-leucine amide | PGLA                | Disrupts cell membrane                                                                          | n.a.                      |
| Pexiganan                     | PEX                 | Disrupts cell membrane                                                                          | Yes                       |
| Pleurocidin                   | PLEU                | Disrupts cell membrane;<br>Induces ROS formation;<br>Inhibits protein and DNA synthesis         | n.a.                      |
| Polymyxin B                   | PXB                 | Disrupts cell membrane;<br>Induces ROS formation                                                | Yes                       |
| PR-39                         | PR39                | Inhibits protein and DNA synthesis                                                              | n.a.                      |
| Protamine                     | PROA                | Affects cellular respiration and glycolysis;<br>Disrupts cell envelop                           | n.a.                      |
| R8                            | R8                  | n.a                                                                                             | n.a                       |
| Tachyplesin II                | TPII                | Disrupts cell membrane                                                                          | n.a                       |

997  
 998 n.a. – no data available
